# Supplementary material for: Defining variant-resistant epitopes targeted by SARS-CoV-2 antibodies: A global consortium study
Source: PubMed Central journal article supplement (PMC9302186; doi:10.1126/science.abh2315), 2021-09-23
Supplement: NIHMS1811249-supplement-Supplemental_Figures.pdf [file NIHMS1811249-supplement-Supplemental_Figures.pdf]

631

632

## Supplementary Materials for

633

Defining variant-resistant epitopes targeted by SARS-CoV-2 antibodies: A Global

634

Consortium study

635

Kathryn M. Hastie<sup>1§</sup>, Haoyang Li<sup>1§</sup>, Daniel Bedinger<sup>2</sup>, Sharon L. Schendel<sup>1</sup>, S. Moses Dennison<sup>3</sup>,

636

Kan Li<sup>3</sup>, Vamseedhar Rayaprolu<sup>1</sup>, Xiaoying Yu<sup>1</sup>, Colin Mann<sup>1</sup>, Michelle Zandonatti<sup>1</sup>, Ruben Diaz

637

Avalos<sup>1</sup>, Dawid Zyla<sup>1</sup>, Tierra Buck<sup>1</sup>, Sean Hui<sup>1</sup>, Kelly Shaffer<sup>1</sup>, Chitra Hariharan<sup>1</sup>, Jieyun Yin<sup>1</sup>,

638

Eduardo Olmedillas<sup>1</sup>, Adrian Enriquez<sup>1</sup>, Diptiben Parekh<sup>1</sup>, Milite Abraha<sup>3</sup>, Elizabeth Feeney<sup>3</sup>,

639

Gillian Q. Horn<sup>3</sup>, CoVIC-DB team<sup>1</sup>, Yoann Aldon<sup>4</sup>, Hanif Ali<sup>5</sup>, Sanja Aracic<sup>6</sup>, Ronald R. Cobb<sup>7a</sup>,

640

Ross S. Federman<sup>8</sup>, Joseph M. Fernandez<sup>9</sup>, Jacob Glanville<sup>10</sup>, Robin Green<sup>8</sup>, Gevorg Grigoryan<sup>8</sup>,

641

Ana G. Lujan Hernandez<sup>11</sup>, David D. Ho<sup>12</sup>, Kuan-Ying A. Huang<sup>13</sup>, John Ingraham<sup>8</sup>, Weidong

642

Jiang<sup>14</sup>, Paul Kellam<sup>15,16</sup>, Cheolmin Kim<sup>17</sup>, Minsoo Kim<sup>17</sup>, Hyeong Mi Kim<sup>17</sup>, Chao Kong<sup>18</sup>,

643

Shelly J. Krebs<sup>19</sup>, Fei Lan<sup>9,20</sup>, Guojun Lang<sup>18</sup>, Sooyoung Lee<sup>17</sup>, Cheuk Lun Leung<sup>8</sup>, Junli Liu<sup>14</sup>,

644

Yanan Lu<sup>9,21</sup>, Anna MacCamy<sup>22</sup>, Andrew T. McGuire<sup>22</sup>, Anne L. Palser<sup>15</sup>, Terence H. Rabbitts<sup>5,23</sup>,

645

Zahra Rikhtegaran Tehrani<sup>24</sup>, Mohammad M. Sajadi<sup>24</sup>, Rogier W. Sanders<sup>4</sup>, Aaron K. Sato<sup>11</sup>,

646

Liang Schweizer<sup>25</sup>, Jimin Seo<sup>17</sup>, Bingqing Shen<sup>25</sup>, Jonne J. Snitselaar<sup>4</sup>, Leonidas Stamatatos<sup>22</sup>,

647

Yongcong Tan<sup>18</sup>, Milan T. Tomic<sup>7b</sup>, Marit J. van Gils<sup>4</sup>, Sawsan Youssef<sup>10</sup>, Jian Yu<sup>12</sup>, Tom Z.

648

Yuan<sup>11</sup>, Qian Zhang<sup>25</sup>, Bjoern Peters<sup>1,26</sup>, Georgia D. Tomaras<sup>3</sup>, Timothy Germann<sup>2</sup>, and Erica

649

Ollmann Saphire<sup>1,26\*</sup>

650

651

Correspondence to: [erica@lji.org](mailto:erica@lji.org) (EOS)

652 **This PDF file includes:**

653

654 Materials and Methods

655 Figures. S1 to S15

656 (Tables S1 to S4 are uploaded separately)

657 References (*40–56*)

658



## 659 **Materials and Methods**

### 660 **Generation of mutant SARS-CoV-2 Spike proteins**

661 Spike proteins were generated for epitope binning studies and structural biology using the HexaPro background  
662 [containing residues 14-1208 (Genbank: MN908947) of the ectodomain, six proline substitutions (F817P, A892P,  
663 A899P, A942P, K986P, V987P) (40)], as well as the D614G mutation, which was already established in all/most  
664 variants associated with spillover/spillback in Northern Europe(2), and replacement of cleavage site residues 682-685  
665 (“RRAR” to “GSAS”). The resulting Spike variants were cloned into a pHCMV mammalian expression vector  
666 containing an N-terminal Gaussia luciferase signal sequence (MGVKVLFALICIAVAEA) and a C-terminal foldon  
667 trimerization domain, followed by an HRV-3C cleavage site and a Twin-Strep-Tag. Plasmids were transformed into  
668 Stellar competent cells and isolated using a Plasmid Plus Midi kit (Qiagen).

669

### 670 **Transient transfection and protein purification**

671 SARS-CoV-2 HexaPro Spike was transiently transfected into Freestyle 293-F or ExpiCHO-S cells (Thermo Fisher).  
672 Both cell lines were maintained and transfected according to manufacturer’s protocols. Briefly, 293-F cells were  
673 grown to a density of  $2.0 \times 10^6$  cells/mL and diluted to  $1.0 \times 10^6$  cell/mL on the day of transfection (day 0). Plasmid  
674 DNA and polyethyleneimine were mixed in Opti-MEM (Gibco), incubated for 25 minutes, and then added to the cells.  
675 Cell cultures were incubated at 37 °C, 8% CO<sub>2</sub>, and 120 RPM, and harvested on day 5. For ExpiCHO cultures, the  
676 manufacturer’s “High Titer” protocol was used. Briefly, cells were grown to a density of  $1 \times 10^7$  cells/mL and diluted  
677 to  $6 \times 10^6$  cells/mL on the day of transfection (day 0). Plasmid DNA and Expifectamine were mixed in Opti-PRO SFM  
678 (Gibco) according to manufacturer’s instructions, and added to the cells. On day 1, cells were fed with manufacturer-  
679 supplied feed and enhancer according to the suggested protocol, and cultures were then incubated at 32 °C, 5% CO<sub>2</sub>  
680 and 115 RPM. ExpiCHO cultures were harvested on day 7. All cultures were clarified by centrifugation, followed by  
681 addition of BioLock (IBA Life Sciences), and supernatants were flowed through a 0.22 µM sterile filter and purified  
682 on an ÄKTA GO (Cytiva) using a 5mL StrepTrap-HP column equilibrated with TBS buffer (25mM Tris pH 7.6,  
683 200mM NaCl, 0.02% NaN<sub>3</sub>), and eluted in TBS buffer supplemented with 5mM d-desthiobiotin (Sigma Aldrich). The  
684 strep-tags were cleaved using HRV-3C protease and the proteins were further purified by size-exclusion-  
685 chromatography (SEC) on a Superdex 6 increase 10/300 column (GE) in TBS.

686

687 **CoVIC antibodies**

688 Antibodies analyzed in this study were isolated using various methods. Unless otherwise noted, all antibodies were  
689 affinity-purified with Protein A chromatography (GE Life Sciences; MabSelect Sure Protein A affinity resin, Cytiva).  
690 Protein concentrations were calculated from the OD<sub>280</sub> value and calculated extinction coefficient. A total of 27  
691 antibodies used in the study were derived from memory B cells isolated from peripheral blood mononuclear cells  
692 (PMBCs) collected from convalescent COVID-19 patients after obtaining informed consent. These antibodies were  
693 isolated: (i) using a phage library of single-chain variable fragments in biopanning to screen for phage that bound  
694 SARS-CoV-2 RBD. Heavy and light chains for this antibody were inserted into mammalian expression vectors and  
695 the antibody was produced from stably transfected CHO-K1 cells; (ii) as described by Seydoux et al.(41); (iii)  
696 amplification of reverse-transcribed sequences from single B cell cDNA that encode immunoglobulin heavy (IGH)  
697 and light (IGL) chains and cloning via homologous recombination into mammalian expression vectors that were used  
698 for transient-transfection of Expi293 cells that were allowed to express the antibody for 5-7 days; (iv) labeling of  
699 memory B cells with SARS-CoV-2 Spike antigen conjugated with TotalSeq™-C0953 PE Streptavidin (cat# 405265)  
700 and loading the single cell suspension onto the 10x Genomics Chromium Controller, microfluidics chip and then  
701 preparing the VDJ library based on manufacturer's instructions, selecting the cells capable of binding to the SARS-  
702 CoV-2 Spike antigen and cloning of their VDJ sequences into IgG1 heavy and light chain vectors and co-transfection  
703 of the resulting plasmid into FreeStyle-293 cells (Thermo Fisher); (v) through affinity-purification of antigen-specific  
704 antibodies from patient serum followed by liquid chromatography-mass spectrometry (LC-MS) analysis. In parallel,  
705 B cells from the same patients were sequenced to generate an IgG repertoire database with paired VH and VL chains.  
706 The mass spectra data together with the paired repertoire database were then used to map the antibody sequence. This  
707 antibody was purified from TunaCHO cells (LakePharma); or (vi) using Berkeley Lights Beacon technology to  
708 identify and clone SARS-CoV-2 Spike-reactive B-cells. The resulting H/L chain pairs were amplified by rounds of  
709 RT and PCR and cloned into phCMV3-based expression vectors encoding the human IgG1 heavy chain constant  
710 region and kappa or lambda light chain constant region. For one antibody, a eukaryotic expression vector containing  
711 the DNA sequence corresponding to the extracellular domain of human ACE2 fused with human IgG1 Fc was used  
712 to produce stably transfected CHO cells that were then used for purification of clinical-grade protein by Shanghai  
713 Henlius Biotech, Inc. according to Good Manufacturing Practice guidelines.  
714 Some antibodies were expressed from 293-F cells transfected with the heavy chain and light chain using  
715 polyethylenimine. Between 5 and 7 days after transfection the cells were pelleted, the supernatant filtered and the

716 antibodies were affinity-purified. One set of antibodies was generated via computational generation algorithms  
717 (Generate Biomedicines), formatted as scFvs, and tested for binding using yeast display. This set included one  
718 antibody that was computationally derived from a camelid VHH antibody. Following successful binding as an scFV,  
719 the variable domain was expressed and purified as an Fc-fusion. ScFv constructs fused to a c-myc epitope tag were  
720 synthesized as DNA fragments (Twist Biosciences) with overhangs for cloning into a yeast display vector. DNA  
721 inserts and digested vectors were transformed into yeast, and the full plasmid was generated *in vivo* by homologous  
722 recombination(42). Cells were induced for scFv expression and displayed on the yeast cell surface(42). Induced cells  
723 were stained for binding to biotinylated SARS-CoV-2 receptor binding domain (RBD) antigen (Acro Biosystems) or  
724 SARS-CoV RBD (Genscript) and anti-c-myc (Exalpha) for scFv expression. ScFv constructs demonstrating binding  
725 by yeast surface display were reformatted into full-length human immunoglobulin 1 (IgG1) by subcloning the variable  
726 heavy (VH) chain and variable light (VL) chains into mammalian expression vectors containing a CMV promoter  
727 sequence, signal peptide, and corresponding constant regions using the Gibson cloning method (Codex  
728 DNA). Purified DNA was transfected into ExpiCHO cells following the manufacturer's recommended methods  
729 (Thermo Fisher Scientific). Following purification with MabSelect Sure Protein A affinity resin (Cytiva) the  
730 antibodies were further purified by size exclusion chromatography using Superdex200 resin (Cytiva) following the  
731 manufacturer's recommended methods. One antibody derived from llama immunized with prefusion stabilized SARS-  
732 CoV-1 with cross-reactivity to SARS-CoV-2 was cloned into a single expression plasmid containing two copies of  
733 the VHH binding domain linked in tandem, which in turn was linked to a tetramerization domain as described  
734 previously(43). Simple expression of the binding domains from this monomeric building block constructed following  
735 transfection of 293 cells allowed for the expression and assembly of soluble secreted protein as stable tetramers. One  
736 antibody was derived from Retained Display (ReD) scFv libraries in a screen against the SARS-CoV-2 S protein RBD  
737 domain(44). The scFv was reformatted to a diabody with a 6x-His fusion. The diabody was overexpressed in *E. coli*  
738 and subsequently purified by ni-NTA and size exclusion chromatography. The purity was assessed by SDS-PAGE  
739 and aggregation status was determined by HPLC-size exclusion chromatography (SEC) with a column having a 300  
740 Å pore size. One set of antibodies was identified by Sanger sequencing phage at the conclusion of panning rounds.  
741 Variable heavy and variable light regions were reformatted and synthesized as IgG or VHH-Fc and transfected in  
742 Expi293 cells (ThermoFisher A14524) at 2:1 heavy to light chain ratio. Antibodies were purified with Phynexus  
743 Protein A column tips (Phynexus PTH-91-20-07). Another antibody was obtained from a de novo computationally  
744 optimized, fully human SuperHuman 2.0 discovery library (Distributed Bio) and was selected from a rapid screen of

745 billions of human antibodies for cross-reactivity to SARS-CoV-2. The antibodies were expressed from ExpiCHO  
746 cells. Two antibodies were isolated and purified as described(45). Two antibodies were generated by screening from  
747 Sanyoubio's fully human naïve antibody library (FHuNAL, Fab format, 4 x 10<sup>11</sup> library size), fused with IgG1 Fc and  
748 expressed from ExpiCHO cells (Thermo Fisher Scientific). A further set of antibodies were derived from human  
749 immune repertoire mice immunized with SARS-CoV-2 Spike protein. Spike binding memory B cells were single cell  
750 sorted and the IgG H/L chains sequenced. Fully human IgG1 antibodies were synthesized from the sequences,  
751 expressed in suspension CHO cells. Other antibodies were isolated and purified as described previously (46–51).

752

753

#### 754 **High-throughput SPR epitope binning**

755 Epitope binning was performed with a classical sandwich assay format on a Cytiva LSA<sup>®</sup> HT-SPR instrument  
756 equipped with a CMDP sensor chip at 25 °C and in a HBSTE-BSA running buffer (10 mM HEPES pH 7.4, 150 mM  
757 NaCl, 3 mM EDTA, 0.05% Tween-20, supplemented with 0.5 mg/ml BSA). Two microfluidic modules, a 96-channel  
758 print-head (96PH) and a single flow cell (SFC), were used to deliver samples onto the sensor chip. Surface preparation  
759 was performed with 25 mM MES pH 5.5 with 0.05% Tween-20 as a running buffer. The chip was activated with a  
760 freshly prepared solution of 130 mM 1-ethyl-3-(3-dimethylaminopropyl)carbodiimide (EDC) + 33 mM N-  
761 hydroxysulfosuccinimide (Sulfo-NHS) in 0.1 M MES pH 5.5 using the SFC. Antibodies were immobilized using the  
762 96PH for 10 minutes at 10 µg/mL diluted into 10 mM sodium acetate (pH 4.25). Unreactive esters were quenched  
763 with a 7-minute injection of 1 M ethanolamine-HCl (pH 8.5) using the SFC. The binning analysis was performed over  
764 this array with the HBSTE-BSA buffer as the running buffer and sample diluent. The RBD antigen was injected in  
765 each cycle for 4 minutes at 50 nM (1.8 µg/mL) and followed immediately by a 4-minute injection of the analyte  
766 antibody at 30 µg/mL (200 nM for IgG constructs). The surface was regenerated each cycle with double pulses (17  
767 seconds per pulse) of 10 mM Glycine pH 2.0.

768 Data was processed and analyzed with Epitope<sup>®</sup> software (Cytiva). Briefly, data was referenced using unprinted  
769 locations on the array and each binding cycle was normalized to the RBD capture level. The binding level of the  
770 analyte antibody just after the end of the injection was compared to that of a buffer alone injection. Signals that were  
771 significantly increased relative to the buffer controls are described as sandwiches and represent non-blocking behavior.  
772 Competition results were visualized as a heat map that depicts blocking relationships of analyte/ligand pairs. Clones

773 having similar patterns of competition are clustered together in a dendrogram and can be assigned to shared  
774 communities.

775

### 776 **High-throughput SPR binding kinetics**

777 The binding kinetics measurements of CoVIC antibody constructs were done on the Carterra LSA platform using  
778 HC30M sensor chips (Carterra) at 25 °C. Two microfluidic modules, a 96-channel print-head (96PH) and a single  
779 flow cell (SFC), were used to deliver liquids onto the sensor chip. In each assay, a single analyte was titrated against  
780 multiple CoVIC antibody constructs.

781 The immobilization of antibody constructs onto the HC30M chips depended on the antibody construct type. For  
782 monoclonal IgG antibodies, goat anti-Human IgG Fc secondary antibody was first immobilized onto the chip through  
783 amine-coupling. Briefly, the chip was first activated by 100 mM N-Hydroxysuccinimide (NHS) and 400 mM 1-Ethyl-  
784 3-(3-dimethylaminopropyl) carbodiimide hydrochloride (EDC) (GE healthcare, mixed 1:1:1 with 0.1 M MES buffer  
785 at pH 5.5) for 600 seconds, followed by immobilization of anti-Hu IgG Fc (in 10 mM Sodium Acetate at pH 4.5) at  
786 50 µg/ml for 900 seconds. Unreactive esters were quenched with a 600-second injection of 1 M ethanolamine-HCl at  
787 pH 8.5. The chip was then exposed to double pulses (30 seconds per pulse) of 10 mM Glycine at pH 2.0. The CoVIC  
788 IgG antibodies were then captured by the anti-Hu IgG Fc at 5 µg/ml for 600 seconds using the 96PH, with 1X HBSTE  
789 buffer (10 mM HEPES pH 7.4, 150 mM NaCl, 3 mM EDTA and 0.01% Tween-20) as running buffer and antibody  
790 diluent. For other types of CoVIC antibody constructs (Fab, scFv, diabodies, etc.), the chip was activated by NHS/EDC  
791 for 600 seconds, followed by direct immobilization of these CoVIC antibody constructs (in 10 mM Sodium Acetate  
792 at pH 4.5) at multiple concentrations for 600 seconds using the 96PH. Unreactive esters were then quenched with a  
793 600-second injection of 1 M ethanolamine-HCl at pH 8.5. Except for the capture of IgG by anti-Hu IgG Fc, the running  
794 buffer was 10 mM MES buffer at pH 5.5 with 0.01% Tween-20, and each CoVIC antibody construct at a given diluted  
795 concentration was immobilized onto 8 separate spots of the same chip, enabling replicating binding kinetics  
796 measurements. Unless specified above, the steps were done using the SFC.

797 A two-fold dilution series of the antigen was prepared in 1x HBSTE buffer. The top concentration for RBD, NTD and  
798 D614-HexaPro was respectively 40 µg/ml (1.11 µM), 320 µg/ml (5.71 µM) and 100 µg/ml (0.181 µM). A single  
799 antigen was used in each assay. The antigen at different concentrations was then injected using SFC onto the chip  
800 surface from the lowest to the highest concentration without regeneration, including several injections of buffer before  
801 the lowest non-zero concentration for signal stabilization. For each concentration, the data collection time-length for

802 baseline, association and dissociation were 120 seconds, 300 seconds and 900 seconds, respectively. For all assays  
803 the running buffer for titration was 1X HBSTE.

804 The titration data collected were first pre-processed in the NextGenKIT (Carterra) software, including reference  
805 subtraction, buffer subtraction and data smoothing. The data were then exported and analyzed using the  
806 TitrationAnalysis tool developed in-house (52). The RBD, NTD and D614-HexaPro binding time courses for each  
807 antibody construct immobilized on different spots were fitted to a 1:1 Langmuir model to derive  $k_a$ ,  $k_d$  and  $K_D$  values.  
808 In case of D614-HexaPro, due to its trimeric nature, the  $K_D$  values derived using the 1:1 binding model fitting  
809 correspond to the avidity of the interaction with antibodies. For each CoVIC antibody construct – antigen pair, the  
810 best triplicate measurements satisfying the preset data acceptance criteria were selected and the averaged  $k_a$ ,  $k_d$  and  
811  $K_D$  values are reported. The preset acceptance criteria for quality control included 1) standard error of the estimated  
812  $k_a$ ,  $k_d$  and  $K_D$  in each replicate  $\leq 20\%$  and 2) fold change for all 3 parameters within the triplicate  $\leq 3$ .

813

#### 814 **ACE-2 blocking assay**

815 ACE2 blocking was measured using Biolayer Interferometry (BLI) on an Octet HTX instrument (Sartorius) by  
816 covalently immobilizing SARS-CoV-2 RBD and Human Serum Albumin (HSA) (reference to subtract response due  
817 to non-specific interactions) onto Amine Reactive 2nd Generation (AR2G) biosensors (Sartorius). The data was  
818 analyzed using Data Analysis HT 12.0 (CFR11) software (Sartorius). The biosensors were activated with a freshly  
819 prepared solution of EDC (1-Ethyl-3-[3-dimethylaminopropyl] carbodiimide hydrochloride) and s-NHS (N-  
820 hydroxysulfosuccinimide) in molecular biology grade water. RBD and HSA were diluted in 10 mM sodium acetate  
821 pH 5 buffer and immobilized onto 96 separate sensors to a loading density threshold not to exceed  $\Delta\lambda = 0.7$  nm.  
822 Unreactive NHS esters on the surface of the sensors were quenched with 1M ethanolamine pH 8.5. Antibody and  
823 ACE2 binding were performed sequentially by dipping the RBD and HSA loaded biosensors into a well plate  
824 containing antibodies at 20  $\mu\text{g/ml}$  followed by a solution of recombinant ACE2 (human IgGFc fused at 27.5  $\mu\text{g/ml}$   
825 for 5 minutes each. The diluent used for preparing antibodies and ACE2 solution was 1x kinetics buffer (Sartorius).  
826 ACE2 binding to immobilized RBD was monitored in real time in the absence and presence of antibodies pre-bound  
827 to RBD. The CoVIC reference mAbs CC12.3 and CC12.14 (24), and control SARS-CoV-2 Spike Neutralizing mAb  
828 (Sino Biological) were included in each experiment. ACE2 blocking assays for CoVIC 240-269 were performed using  
829 a recombinant double-strep tagged ACE2 construct after performing a bridging assay to ensure consistency in percent  
830 ACE2 blocking (for a select set of antibodies) between the two ACE2 constructs. The percent ACE2 blocking was

831 calculated as the percentage of decrease in ACE2 binding due to antibodies pre-bound to RBD compared with the  
832 ACE2 binding to RBD untreated with any antibody (1x kinetics buffer in place of antibody). All measurements were  
833 made in triplicate. The average of ACE2 binding to antibody untreated RBD was set as 0% blocking. The ACE2  
834 blocking percentages shown for the CoVIC antibodies are the mean of triplicate measurements. In each assay, The  
835 SARS-CoV-2 Spike Neutralizing mAb (Sinobiological) was used as a positive control.  
836 Preset data acceptance criterion for CV of triplicate measurements was <20% for antibodies %ACE2 blocking above  
837 the lower limit of detection (LLOD) of 13%. The LLOD was determined empirically using an Influenza  
838 Hemagglutinin specific monoclonal antibody CH65 that does not show reactivity for RBD. ACE2 blocking results  
839 were confirmed (for a subset of antibodies) with a second ACE2 blocking method utilizing a Meso Scale discovery  
840 (MSD, Rockville, MD) assay with Sulfo-Tag conjugated ACE-2.

#### 841 **Negative-stain EM to define antibody binding area**

843 Different antibody formats, including IgG, Fab, scFv and VHH, were used for EM study. Fabs were obtained using  
844 either IdeS (Promega) or papain (Sigma), and purified by ion exchange chromatography using a MonoQ column (GE).  
845 Fab (70 µg), VHH (50 µg), scFv (70 µg) or IgG (140 µg); were incubated with 140 µg purified HexaPro.D614G Spike  
846 ectodomain in TBS buffer overnight at room temperature. The final concentration for Spike or IgG in incubation  
847 solution was ~0.25 µg/µL. Spike-antibody complexes were purified by SEC with a Superdex 6 Increase 10/300 column  
848 (GE) and verified by SDS-PAGE. For each complex, 4 µL of sample (~0.02 mg/mL) was applied to a CF400-Cu  
849 negative-stain grid (Electron Microscopy Sciences), and stained with 0.75% uranyl formate (Electron Microscopy  
850 Sciences). Between 50 and 400 micrographs were collected for each sample using a Titan Halo electron microscope  
851 (Thermo Fisher) and a Falcon 3EC direct electron detector at the magnification of 58,000X. EM-map reconstruction  
852 was performed using CryoSPARC (53), and the maps were aligned and displayed using Chimera X (54). Specifically,  
853 models having different RBD status (One RBD up: PDB:7A94 (39); Two RBDs up: PDB:7DCX (55); and Three  
854 RBDs up: PDB:7K4N (19), were fitted into NS-EM maps for antibody binding area identification. The NS-EM maps  
855 are available in the EMD database ([www.emdataresource.org](http://www.emdataresource.org)) and access numbers are listed in Table S3.

#### 856 **Production of recombinant virions**

858 Recombinant SARS-CoV-2-pseudotyped VSV-ΔG-GFP were generated by transfecting 293T cells with pHCMV3-  
859 SARS-CoV-2 S using TransIT according to the manufacturer's instructions. At 24 hr post-transfection, cells were



860 washed 2x with OptiMEM and then infected with rVSV-G pseudotyped  $\Delta$ G-GFP parent virus (VSV-G\* $\Delta$ G-GFP) at  
861 MOI = 2 for 2 hours with rocking. The virus was then removed, and the cells were washed twice with OPTI-MEM  
862 containing 2% FBS (OPTI-2) before addition of fresh OPTI-2. Supernatants containing rVSV-SARS-2 were removed  
863 24 hours post-infection and clarified by centrifugation.

864

#### 865 **Viral titrations**

866 Vero cells were seeded in 96-well plates at a sufficient density to produce a monolayer at the time of infection. Then,  
867 10-fold serial dilutions of pseudovirus were made and added to cells in triplicate wells. Infection was allowed to  
868 proceed for 16-18 hr at 37 °C before fixation of the cells with 4% PFA and staining with Hoechst (10  $\mu$ g/mL) in PBS.  
869 Fixative/stain was replaced with PBS and pseudovirus titers were quantified as the number of GFP-positive cells  
870 (fluorescent forming units, ffu/mL) using a CellInsight CX5 imager (ThermoScientific) and automated enumeration  
871 of cells expressing GFP.

872

#### 873 **Neutralization Assay**

874 Pre-titrated amounts of rVSV-SARS-CoV-2 were incubated with serially diluted monoclonal antibodies at 37 °C for  
875 1 hr before addition to confluent Vero (ATCC CCL-81) monolayers in 96-well plates. Infection proceeded for 16-18  
876 hrs at 37 °C in 5% CO<sub>2</sub> before cells were fixed in 4% paraformaldehyde and stained with 10  $\mu$ g/mL Hoechst. Cells  
877 were imaged using a CellInsight CX5 imager and infection was quantified by automated enumeration of total cells  
878 and those expressing GFP. Infection was normalized to the average number of cells infected with rVSV-SARS-CoV-  
879 2 incubated with human IgG isotype control. Data are presented as the relative infection for each antibody  
880 concentration. Neutralization IC<sub>50</sub> titers were calculated using “One-Site Fit LogIC<sub>50</sub>” regression in GraphPad Prism  
881 9.0. Precision and accuracy of the Sapphire lab pseudovirus neutralization assay were evaluated in the SARS-CoV-2  
882 neutralization assay concordance survey (SNACS), ranking among the highest for specificity, precision and accuracy.

883

884

885

886





891 **Figure S1. Emerging variants-related mutations on SARS-CoV-2 Spike.** A. Schematic of  
892 SARS-CoV-2 Spike primary structure with subunit positions and domains. SP: signal peptide;  
893 NTD: N-terminal domain; RBD: receptor-binding domain; SD1: subdomain 1; SD2: subdomain  
894 2; S1/S2: furin cleavage site; S2': S2 sub-cleavage site; FP: fusion peptide; CH: central helix HR1:  
895 heptad repeat 1; CD: connector domain; HR2: heptad repeat 2; TM: transmembrane domain; CT:  
896 cytoplasmic tail. B. Positions and substitutions of variant-related mutations in SP and NTD. C.  
897 Positions and substitutions of variant-related mutations in RBD, SD1, SD2 and S2 subunit.  
898 Variants of Concern (VOC) and Variants of Interest (VOI) are identified and updated (July 1st,  
899 2021) by the World Health Organization ([www.who.int/en/activities/tracking-SARS-CoV-2-](http://www.who.int/en/activities/tracking-SARS-CoV-2-variants)  
900 [variants](http://www.who.int/en/activities/tracking-SARS-CoV-2-variants)). WHO Label, Pango lineage ([cov-lineages.org](http://cov-lineages.org)) and GISAID clade/lineage ([gisaid.org](http://gisaid.org))  
901 for each variant is shown. The mutations and deletions are compared to the original Wuhan strain  
902 (GenBank: MN908947.3). The full-variants and mink-associated pseudovariants tested in the  
903 pseudovirus-based neutralization assay in this study are indicated by red stars, and single-point  
904 mutations and deletions ( $\Delta$ ) for neutralization testing are in red text.  
905

### Ab-Spike association

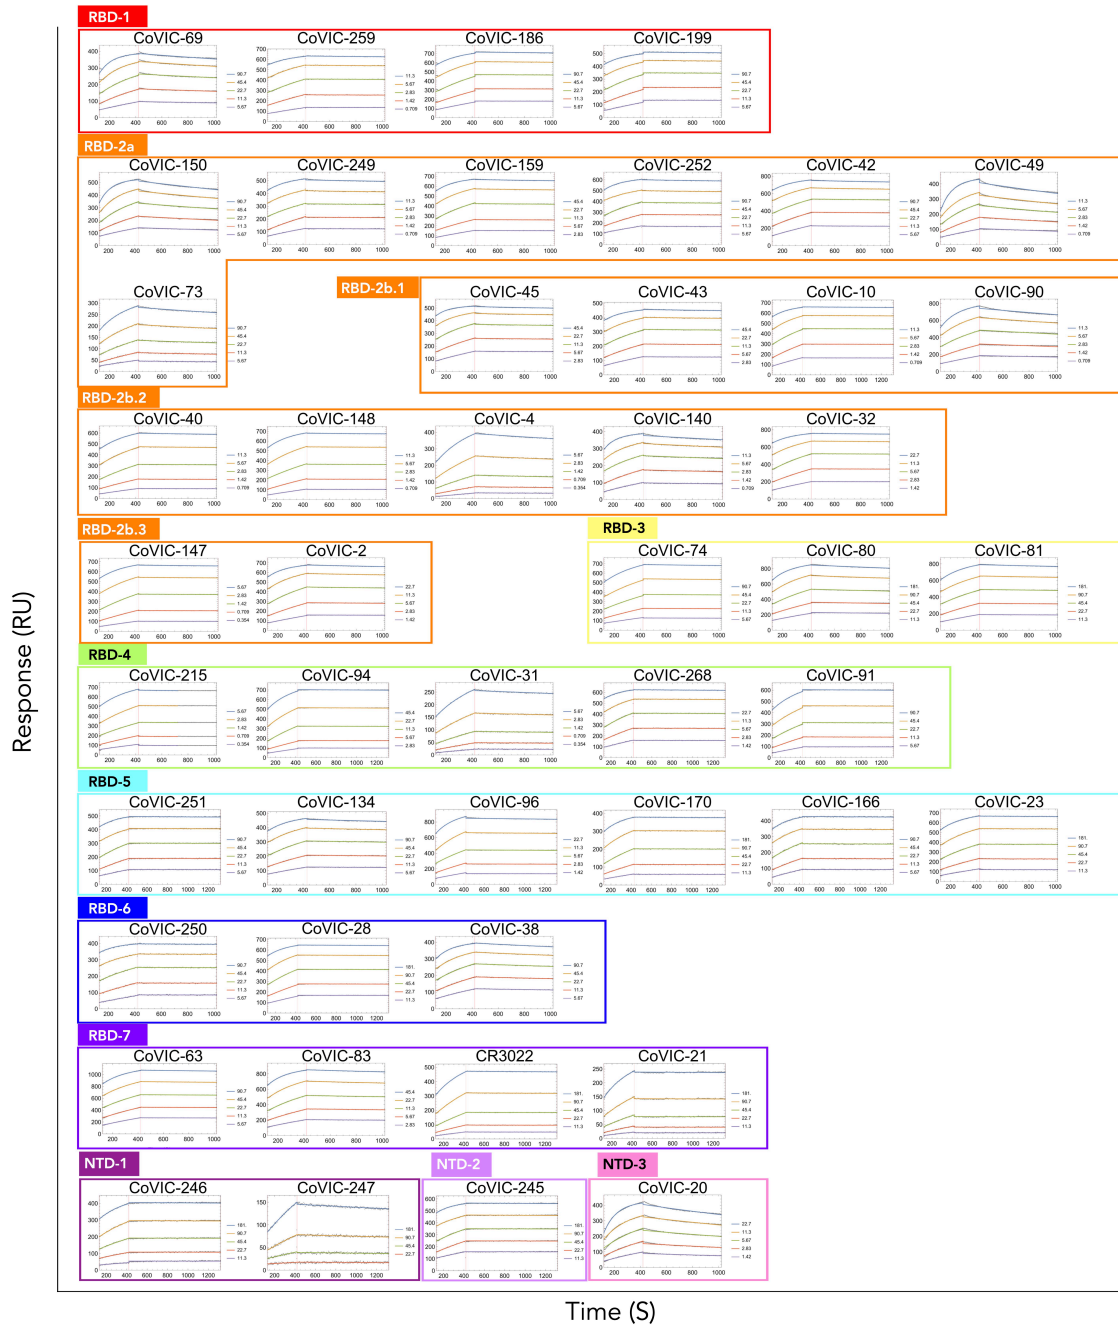

Fig. S2

909 **Figure S2. Sensorgrams of Spike (D614-HexaPro) binding by a select number of CoVIC**  
910 **mAbs.** Representative Spike-binding sensorgrams for a subset of CoVIC mAbs, grouped by  
911 community. Underlying data points are in gray, and colored lines were fitted using a Langmuir 1:1  
912 binding model; D614 HexaPro concentrations (nM) selected for fitting are indicated. A red vertical  
913 line separates association data from dissociation data.

### Ab-RBD association

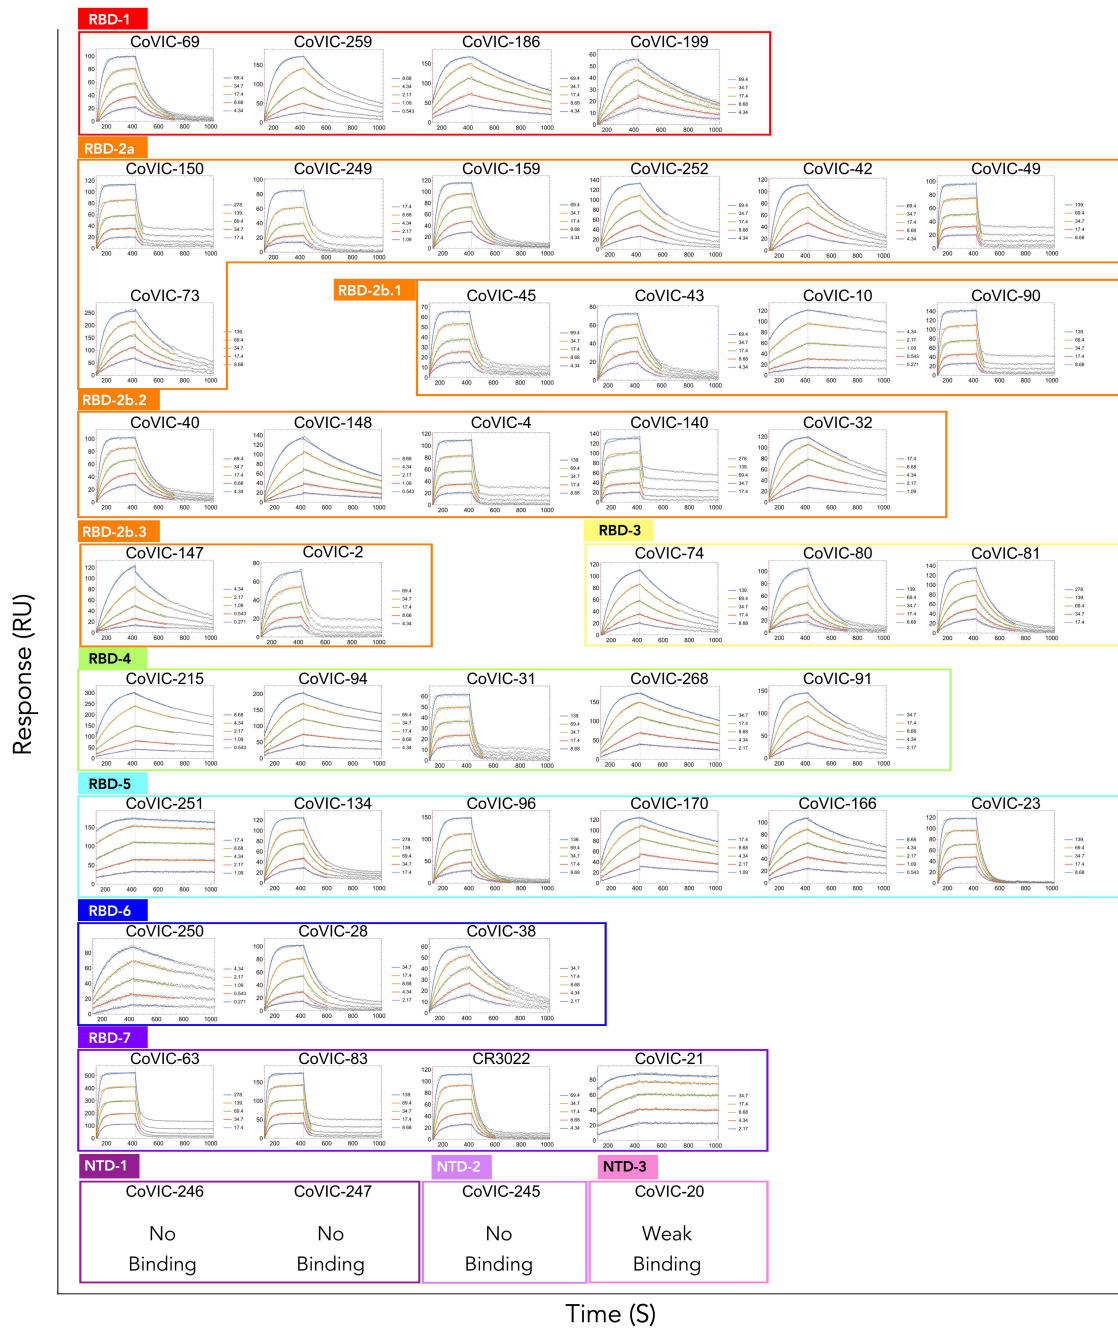

Fig. S3

917 **Figure S3. Sensorgrams of RBD binding by representative RBD-directed CoVIC mAbs.**  
918 Representative RBD-binding sensorgrams for a subset of CoVIC mAbs grouped by community.  
919 Color schemes and fitting are as in Figure S2. If no or close to no binding or extremely weak (<30  
920 RU) binding were observed, “No binding” and “Weak binding” is shown instead of the  
921 sensorgram.

### Ab-NTD association

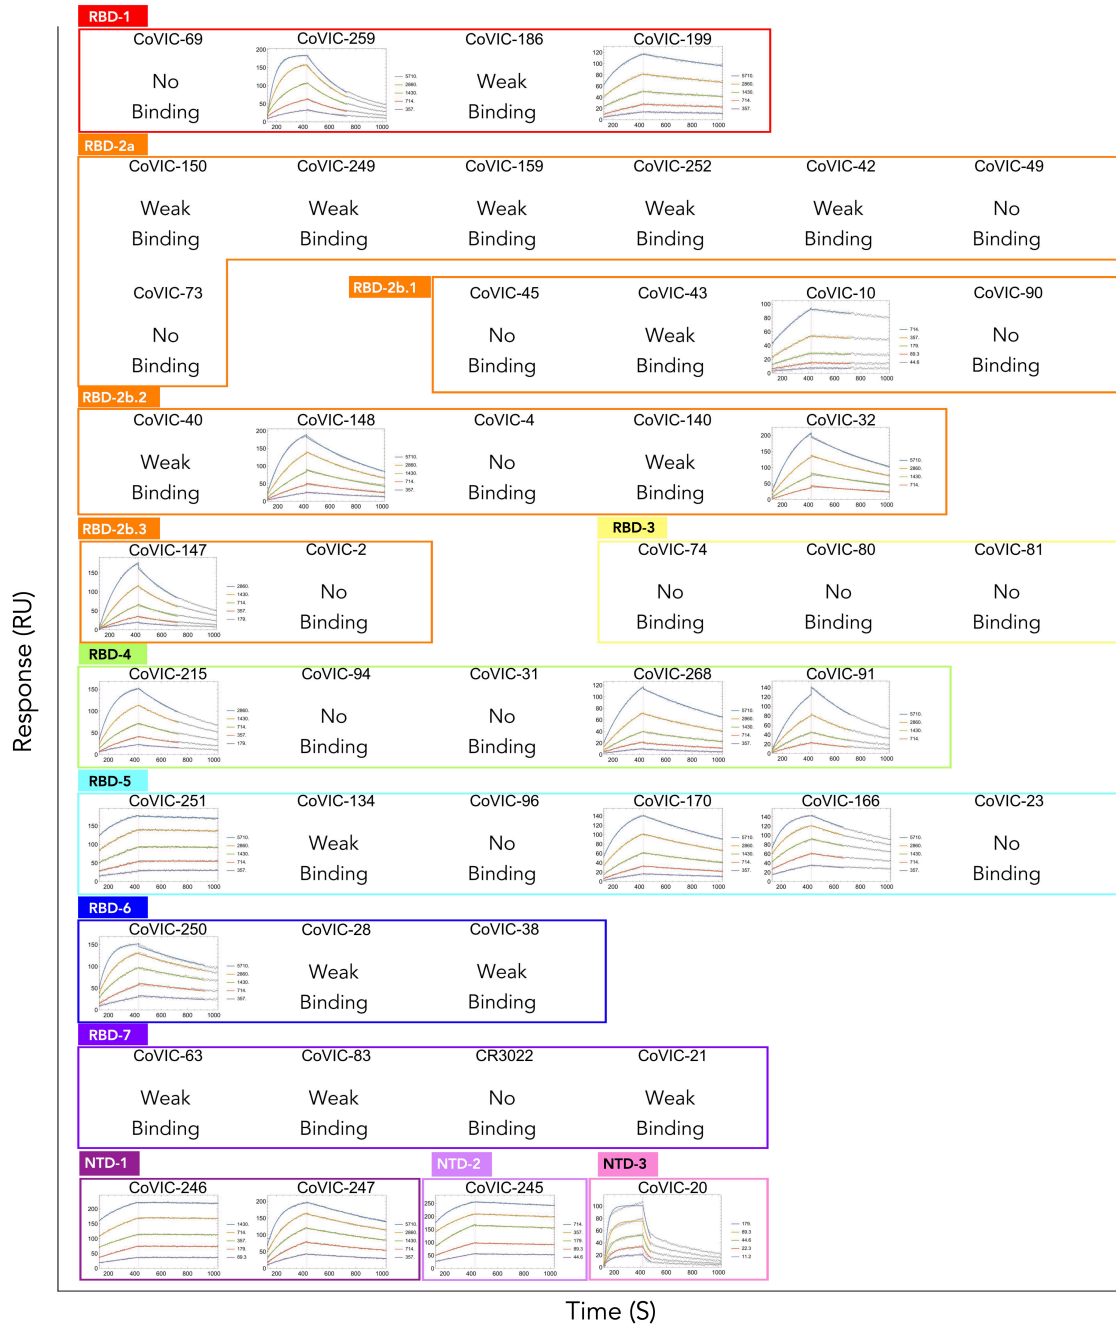

Fig. S4

925 **Figure S4. Sensorgrams of NTD binding by a select number of CoVIC mAbs.** Representative  
926 NTD-binding sensorgrams for a subset of CoVIC mAbs grouped by community. Color schemes  
927 and fitting are as shown in Figure S2. “No binding” instead of a sensorgram appears if no binding  
928 or close to no binding was observed; “Weak binding” appears if a weak response appears ( $< 30$   
929 RU) or affinity ( $KD > 5.7 \mu\text{M}$ ) was observed. The NTD binding shown for RBD community  
930 antibodies indicate the weak cross-reactive nature of these antibodies.



### ACE2 blocking

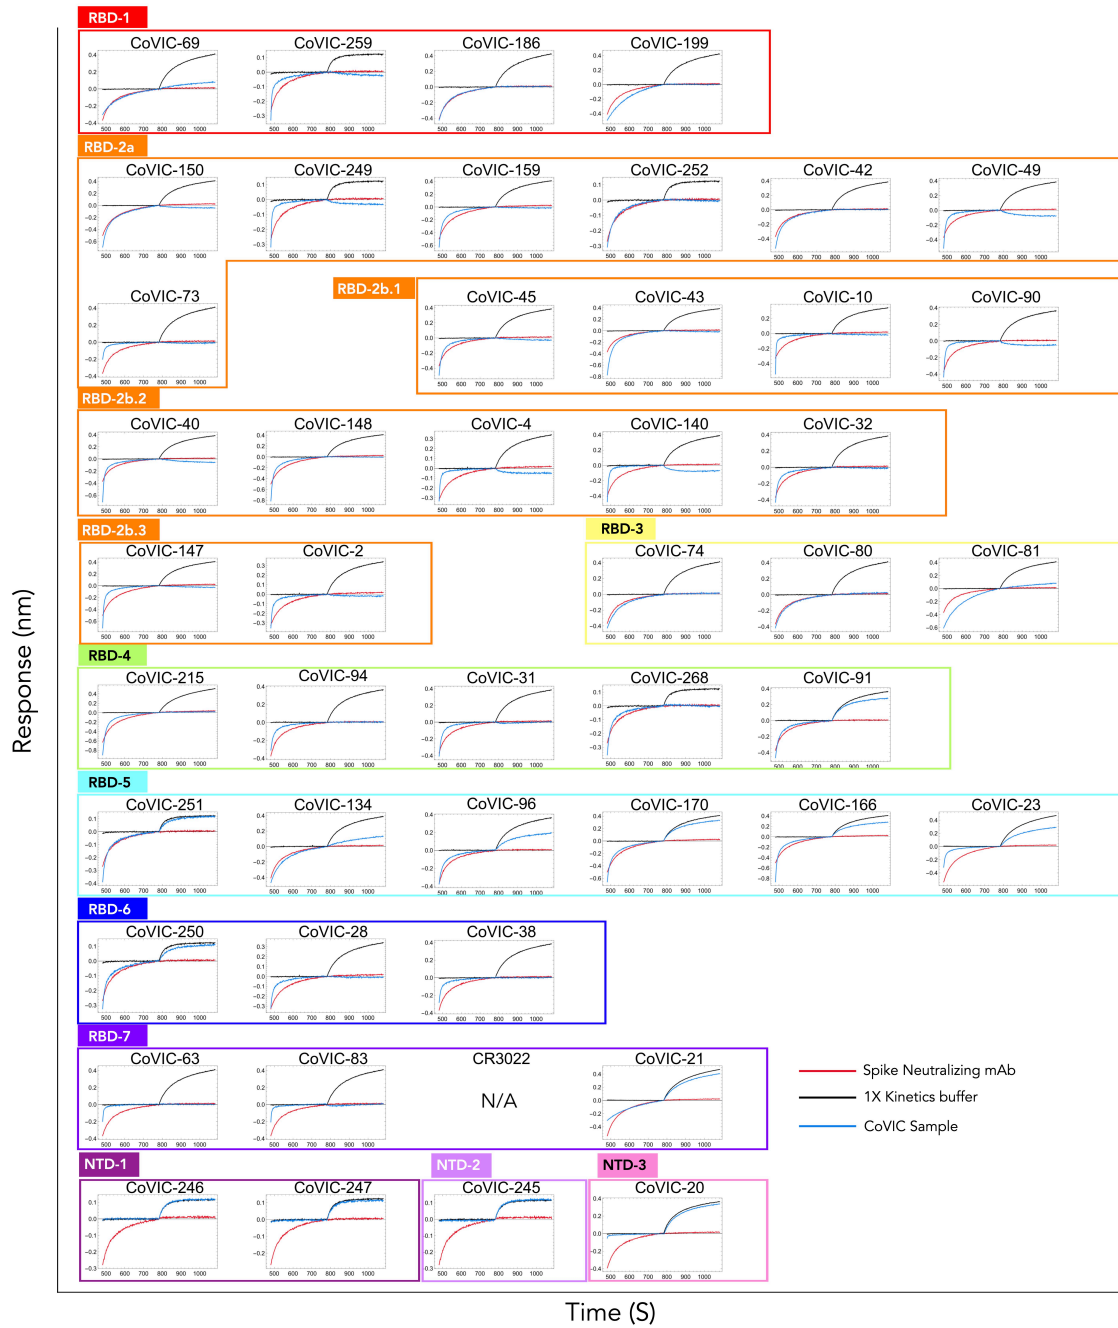

Fig. S5

934 **Figure S5. ACE2 blocking assay sensorgrams.** Representative BLI sensorgrams recorded to  
935 determine ACE2 blocking ability for a subset of CoVIC mAbs grouped by community. Each  
936 sensor was immobilized with RBD before initiating sensorgram acquisition. Each sensorgram  
937 consists of two steps, aligned at the beginning of the second step: binding of the CoVIC antibody  
938 construct, the positive control or kinetics buffer, followed by ACE-2 binding. In each sensorgram,  
939 the blue line corresponds to the CoVIC antibody construct in the first step, the red line corresponds  
940 to SARS-CoV-2 Spike neutralizing antibody (Sino Biological, positive control) in the first step  
941 and the black line corresponds to 1X kinetics buffer in the first step and is the average of triplicate  
942 measurements.

A

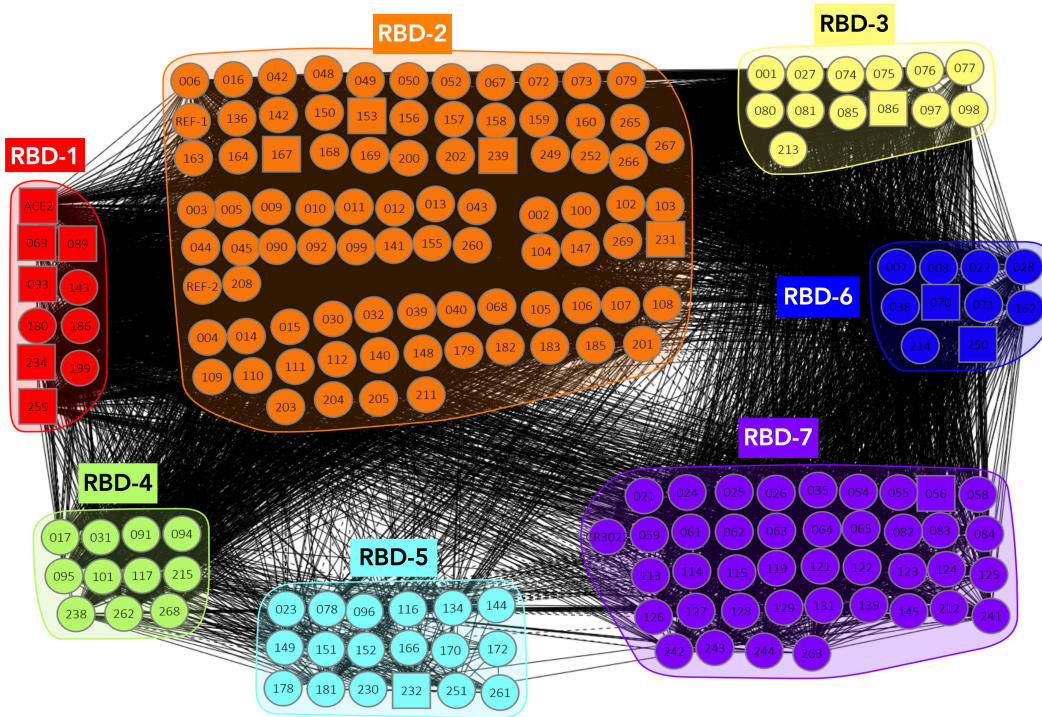

B

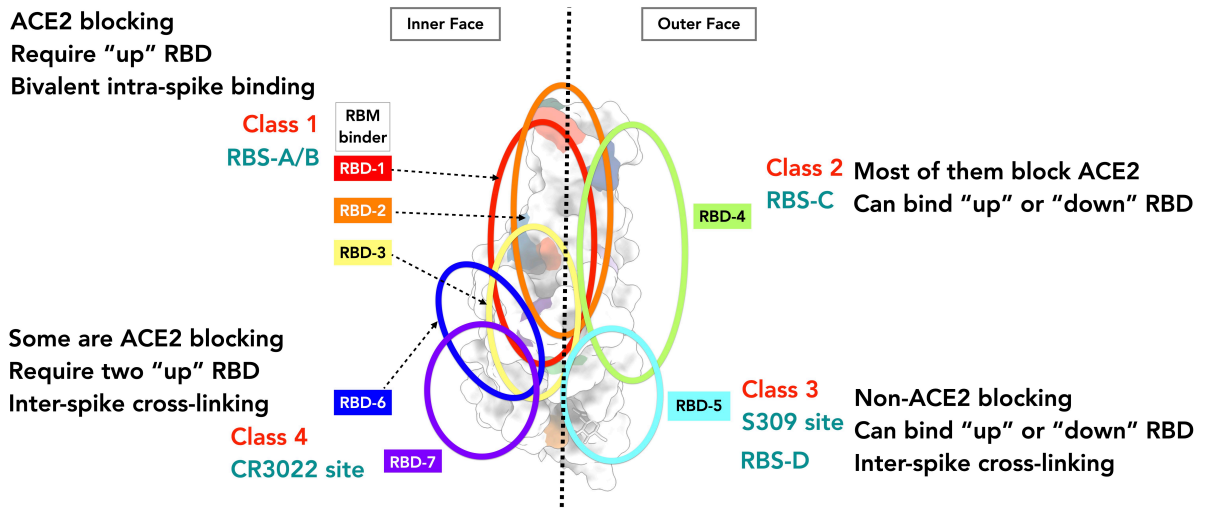

Fig. S6

946 **Figure S6. A. Community plot depicting competition relationships between CoVIC mAbs as**  
947 **determined by epitope binning using HT-SPR against SARS-CoV-2 Spike RBD.** Colored  
948 nodes indicate individual mAbs. Circles and squares denote presence in the matrix either in both  
949 ligand and analyte directions or in only one orientation, respectively. Lines connecting nodes  
950 indicate that the two antibodies compete. The series of overlapping epitopes targeted by mAbs in  
951 the CoVIC panel created extensive competition between clusters. The dataset was analyzed by  
952 Carterra Epitope software to sort competition profiles of clones into related clusters, which are  
953 represented as shared colored regions. **B. Summary of the 7 RBD-directed communities based**  
954 **on antibody competition profiles and interpreted by previous epitope studies.** Ovals  
955 corresponding to the color scheme in Fig. 1 indicate binding epitopes of each community (model  
956 is adapted from PDB: 7A94 (39)). To facilitate comparison with antibodies outside of the CoVIC,  
957 compatibility of the CoVIC classification with previous classifications based on germline and  
958 structural information is shown (10, 16). Communities RBD-1 through -3 (RBM binders): Class 1  
959 or RBS-A/B; community RBD-4 (outer face binders): Class 2 or RBS-C; community RBD-5 (outer  
960 face binders): Class 3 or RBS-D/S309 site; community RBD-6 and -7 (inner face binders): Class  
961 4 or CR3022 site. Information for ACE2 blocking and antibody binding modes of the communities  
962 is also indicated. Corresponding detailed information is provided in Table S1 and S3.

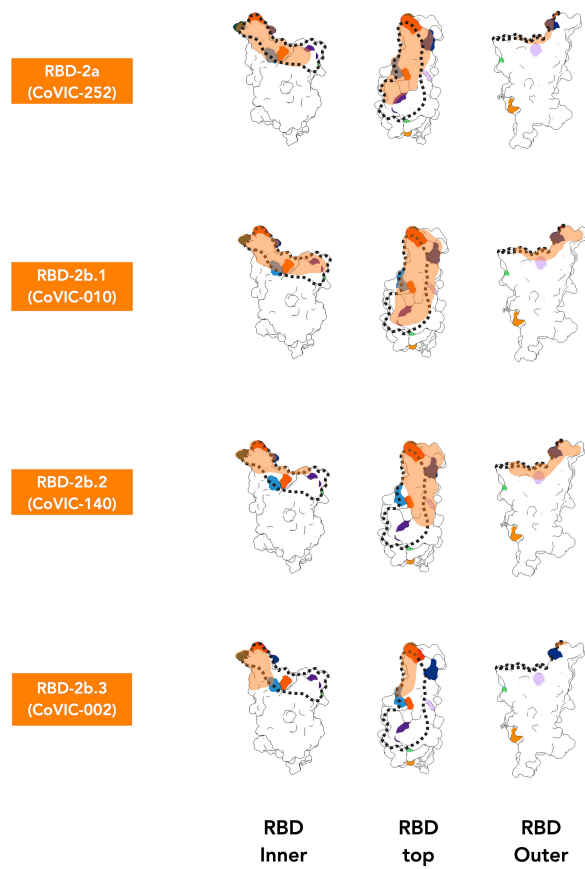

Fig. S7

966 **Figure S7. RBD-2 mAbs bind across the top of the receptor binding motif (RBM).** NS-EM  
967 footprints (colored orange) of representative antibodies from community RBD-2 are mapped onto  
968 an RBD monomer (adapted from PDB: 7A94(39)). The black dotted line indicates the RBM  
969 region.

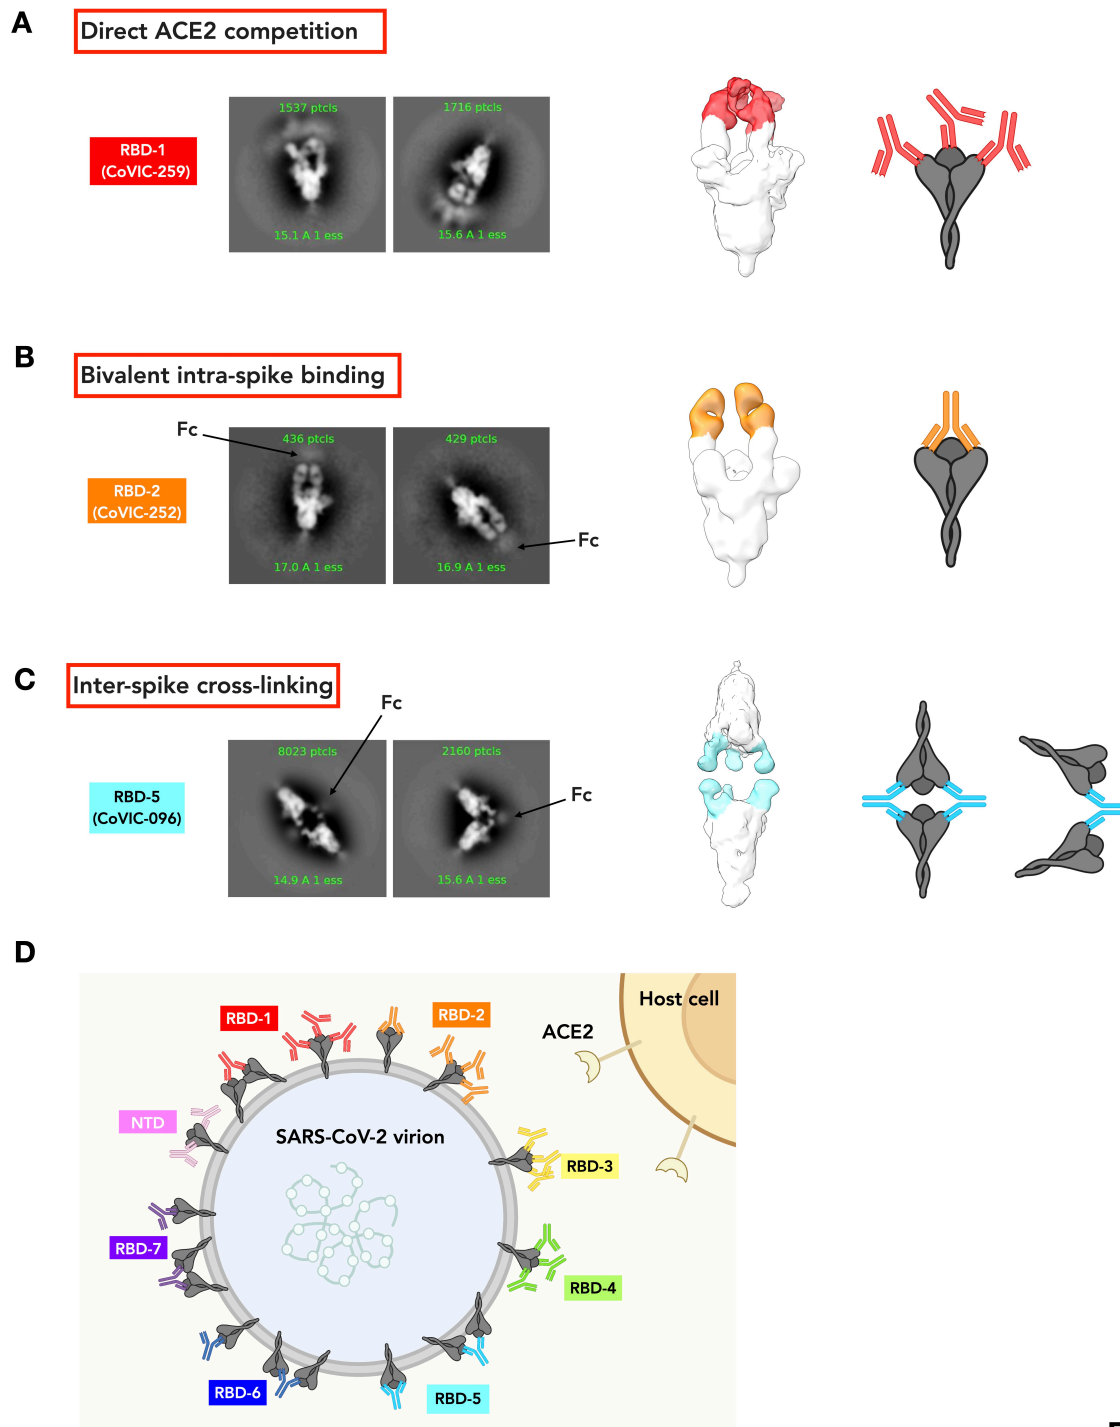

Fig. S8

973 **Figure S8. Three binding patterns for IgG bound to soluble Spike determined by NS-EM**  
974 **reveal potential neutralizing mechanisms.** Particle-averaged 2D classes, 3D maps and cartoon  
975 illustrations of each binding pattern are shown. **A.** RBDs on Spikes are occupied by Fabs from  
976 IgGs in a binding mode that directly blocks interaction between Spike and ACE2 (e.g., CoVIC-  
977 259 from community RBD-1). **B.** Bivalent intra-Spike binding. Two RBDs on one Spike trimer  
978 are occupied by two Fabs from the same IgG (e.g., CoVIC-252 from community RBD-2). **C.** Inter-  
979 Spike crosslinking. Two Spike trimers are crosslinked by IgGs, which may sterically hinder ACE2  
980 access (e.g., CoVIC-096 from community RBD-5). Specifically, there are two different  
981 crosslinking populations: 1) “head-to-head” Spikes crosslinked by 2 or 3 IgGs (this configuration  
982 was seen for the majority of particles) and 2) two “tilted” Spikes crosslinked by one IgG (see for  
983 the remainder of particles). **D.** Summary of possible IgG-Spike binding patterns for each RBD  
984 community.



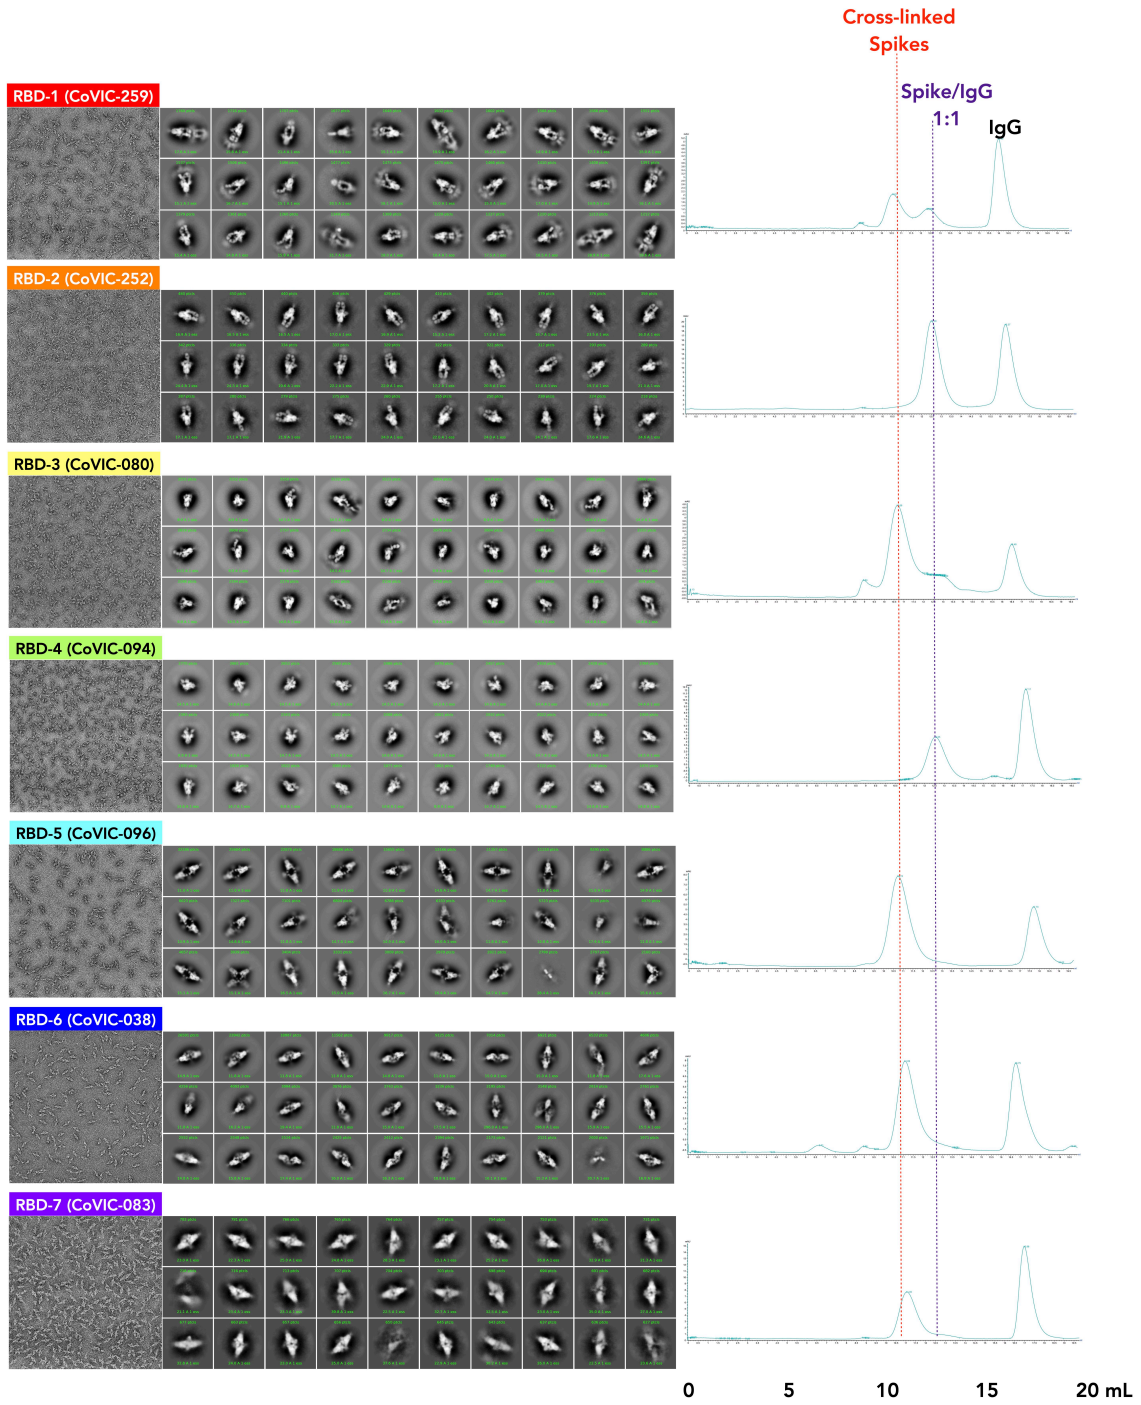

Fig. S9

985  
 986  
 987  
 988  
 989  
 990

991 **Figure S9. Spike/IgG complexes with typical antibodies from each community.** NS-EM  
992 micrographs and 2D-average classes are shown on the left, and the curves of size-exclusion  
993 chromatography (Superdex S6 Increase, GE) are on the right. Each complex was formed by  
994 incubating Spike and IgG at the same final concentrations (0.25  $\mu\text{g}/\mu\text{L}$  Spike + 0.25  $\mu\text{g}/\mu\text{L}$  IgG).  
995 Micrographs were taken at 58,000X magnification. The number of particles used to achieve each  
996 2D-average class are shown in green with the averaged images. The red and purple dotted lines  
997 indicate positions of the peaks corresponding to cross-linked complexes and 1:1 ratio Spike/IgG  
998 complexes, respectively.

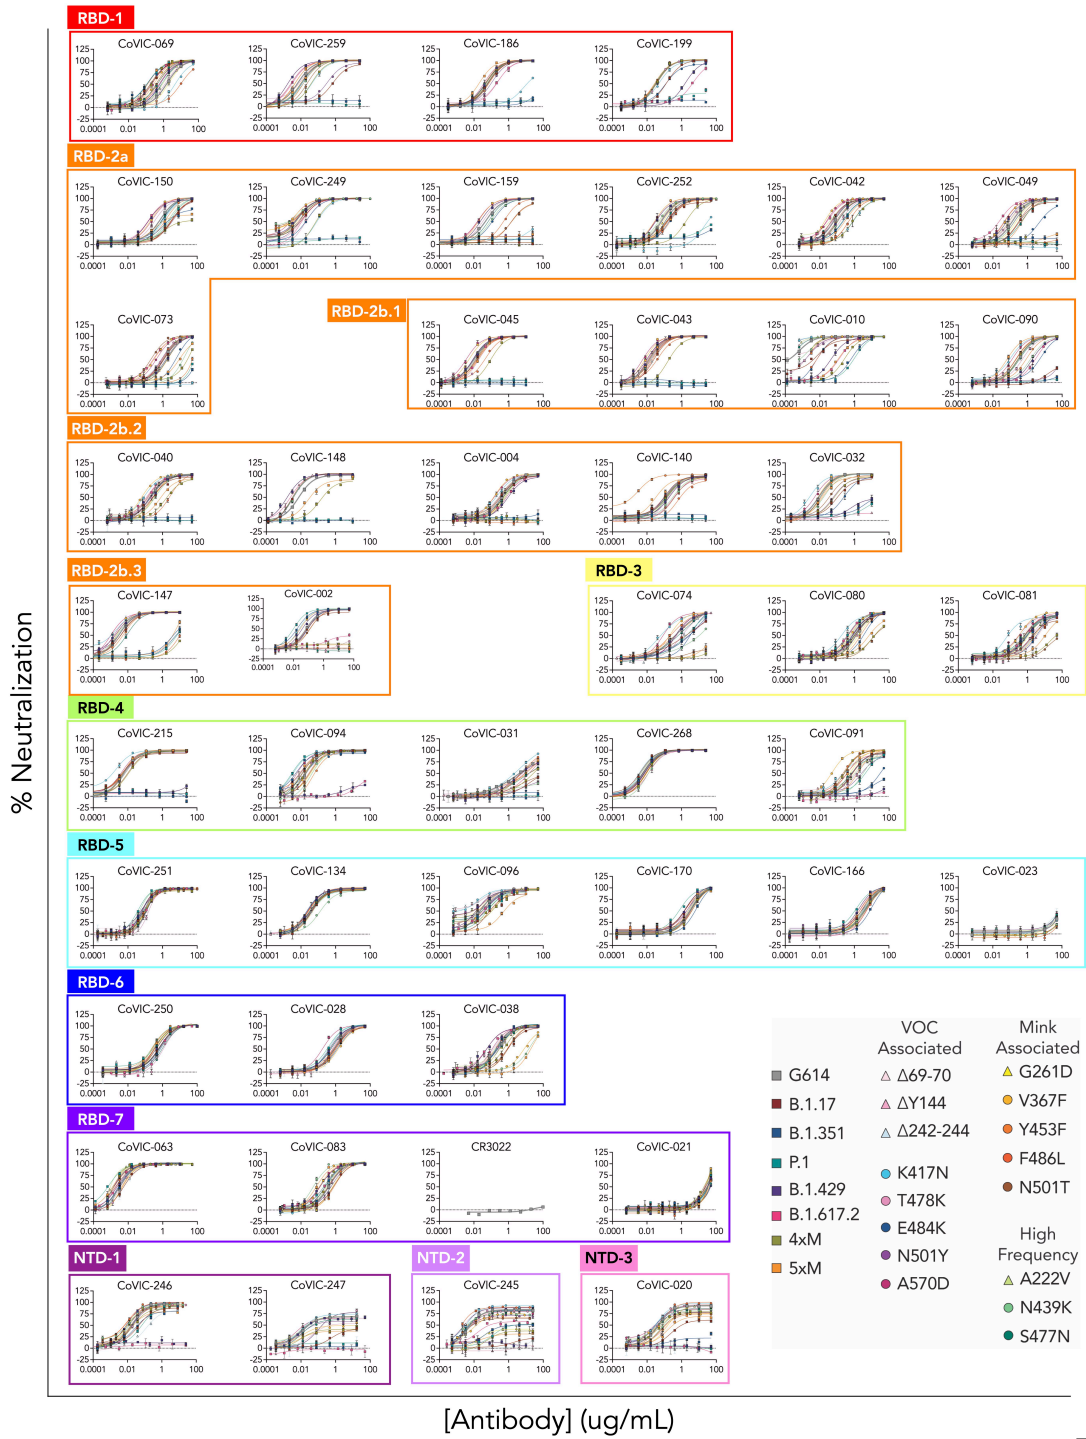

Fig. S10

999

1000

1001

1002 **Figure S10. Neutralization of pseudoviruses with emerging mutations.** The community and  
1003 antibody are indicated for each set of neutralization curves. Error bars indicate the standard  
1004 deviation of technical duplicates, except for the parent G614 pseudovirus in which error bars  
1005 indicate the standard deviation of at least two biological replicates (each performed in duplicate).  
1006  $IC_{50}$  values for each neutralization curve were calculated by nonlinear regression analysis and used  
1007 in the fold-change analysis displayed in Fig. 3 and Table S4.

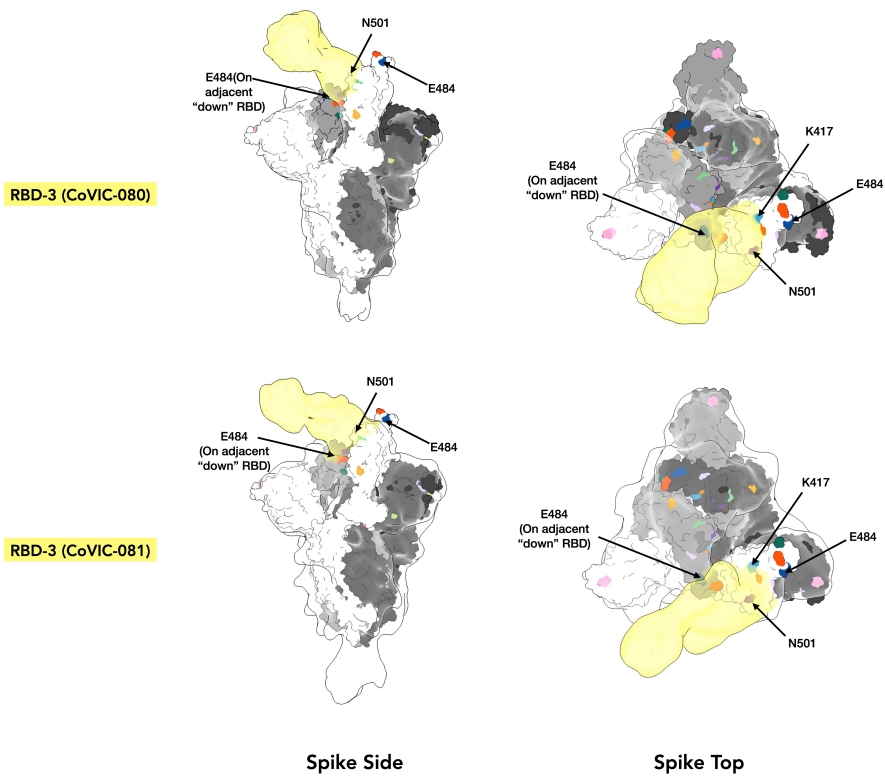

**Fig. S11**

1008  
 1009  
 1010

1011 **Figure S11. Footprints and binding pattern of RBD-3 antibodies.** SARS-CoV-2 Spike model  
1012 with one “up” RBD (PDB:7A94(39)) fits into the NS-EM maps of RBD-3 antibodies CoVIC-080  
1013 and -081. The antibody densities are colored in yellow. Residues that are mutated in VOCs are  
1014 labeled. RBD-3 antibodies bind only to “up” RBDs, but approach at an angle that nears an adjacent  
1015 “down” RBD. The neutralizing activity of RBD-3 is decreased by N501T/Y and E484K, and is  
1016 increased by the K417N mutation. N501 and K417 are located within the footprints on the “up”  
1017 RBD, whereas E484K from the adjacent “down” RBD may impact interaction between Spike and  
1018 RBD-3 antibodies.

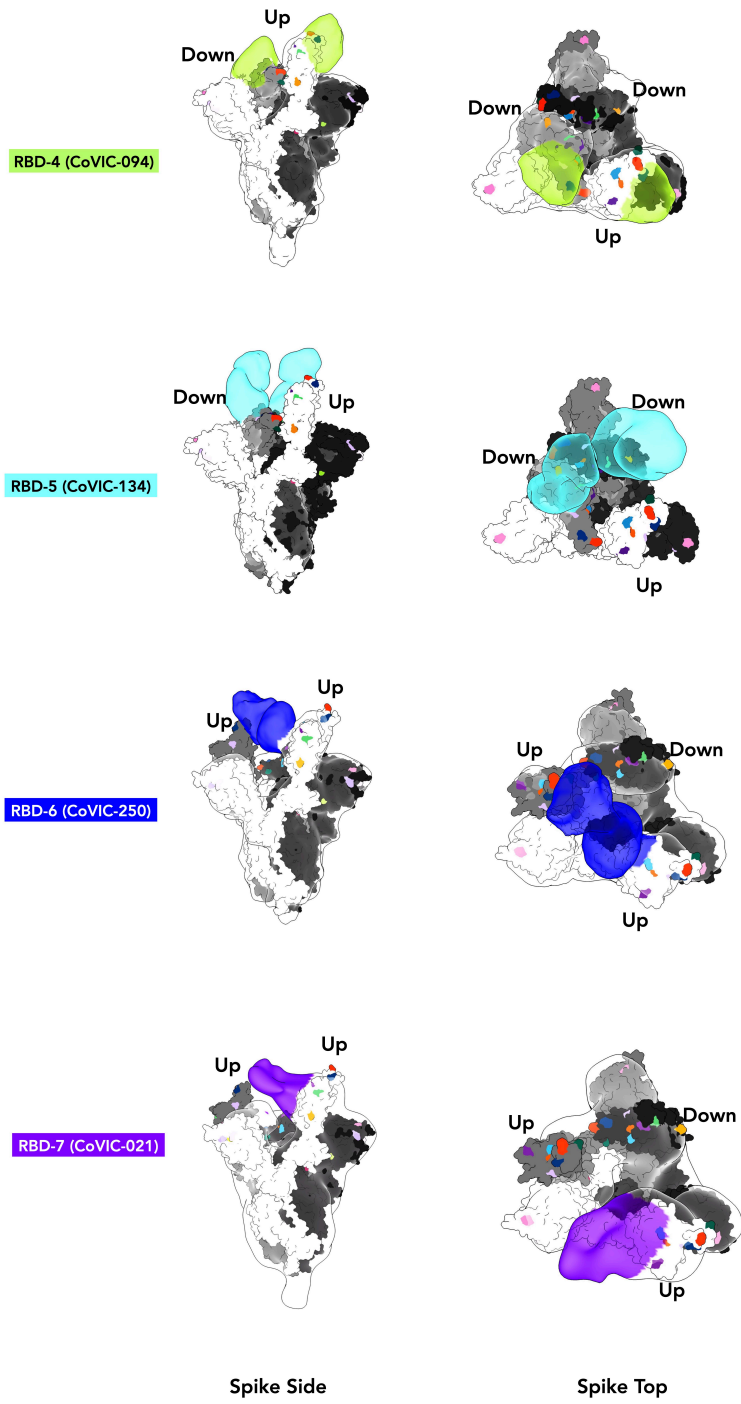

**Fig. S12**

1019

1020

1021

1022 **Figure S12. RBD-binding profiles for select antibodies from communities RBD-4, RBD-5,**  
1023 **RBD-6 and RBD-7.** Representative antibodies from communities RBD-4 and -5 bind to the outer  
1024 face of RBD, and can bind to either “up” or “down” RBDs. Antibodies from communities RBD-6  
1025 and -7 bind to the inner face of RBD and require both the binding and adjacent RBDs to be in the  
1026 “up” conformation. Fabs are indicated by corresponding community colors. Docking models:  
1027 PDB:7A94(39) (one RBD up); PDB:7DCX(55) (two RBDs up).

1028  
1029

1030



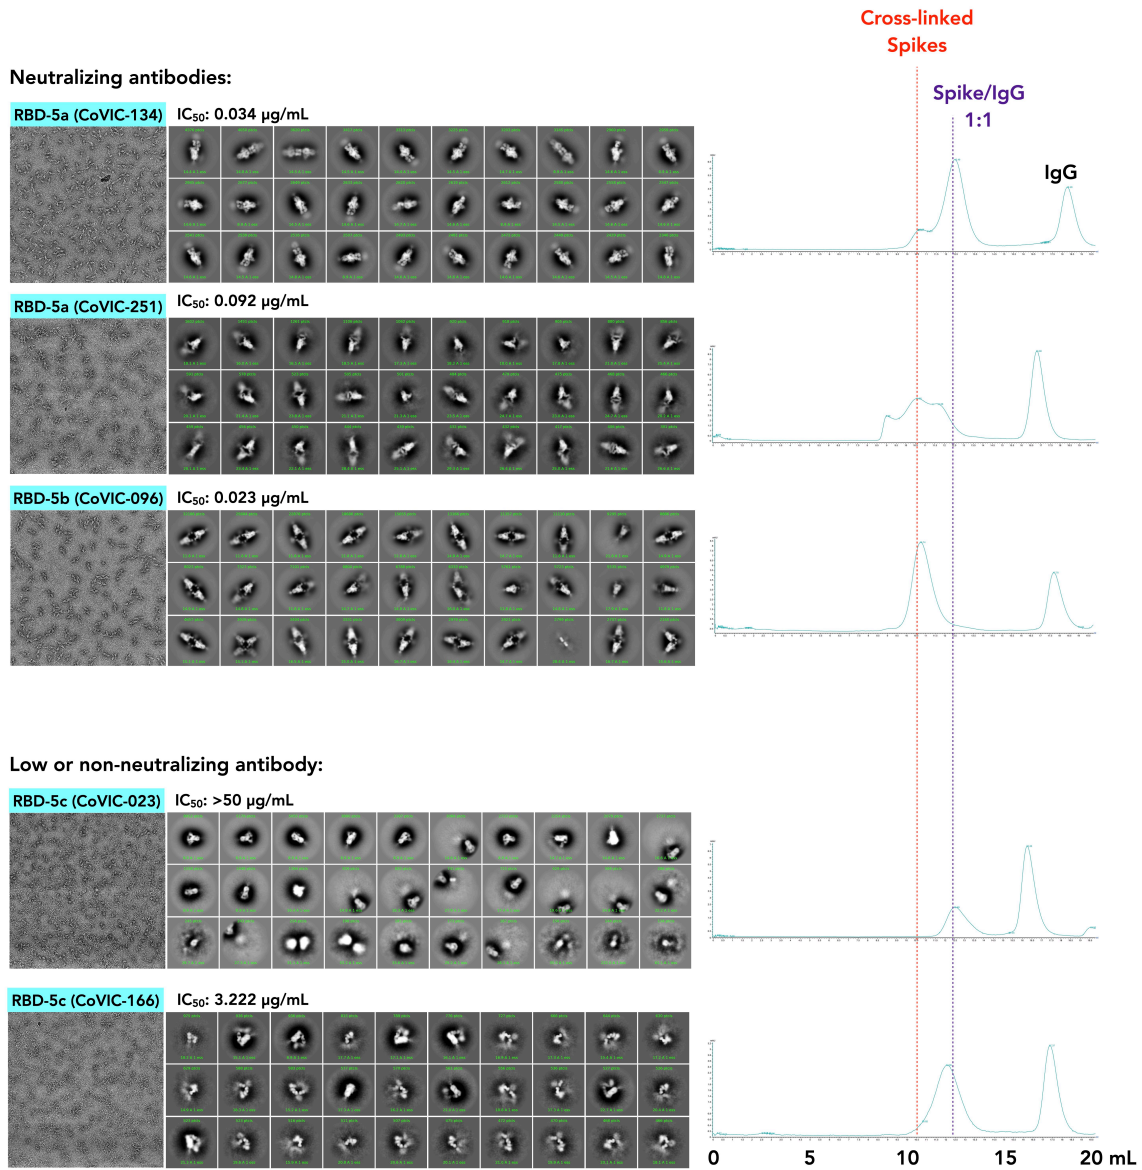

**Fig. S13**

1031

1032

1033

**Figure S13. Spike/IgG complexes with typical antibodies from community RBD-5.** NS-EM micrographs and 2D-average classes are shown on the left, and the curves of size-exclusion chromatography (Superdex S6 Increase, GE) are on the right. Complex formation, image collection and chromatograph labels are the same as in Fig. S9.

1034  
1035  
1036  
1037  
1038  
1039  
1040  
1041  
1042

**A**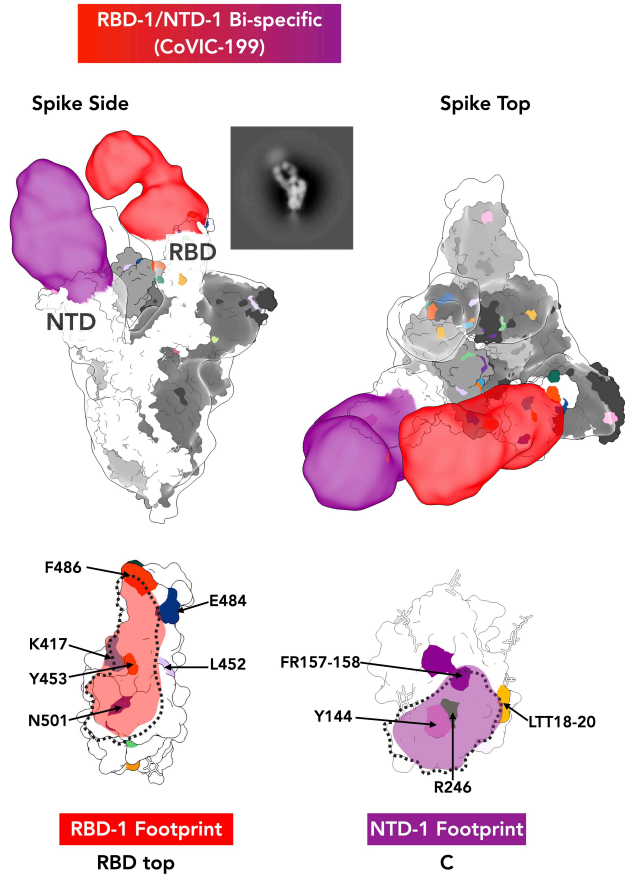**B**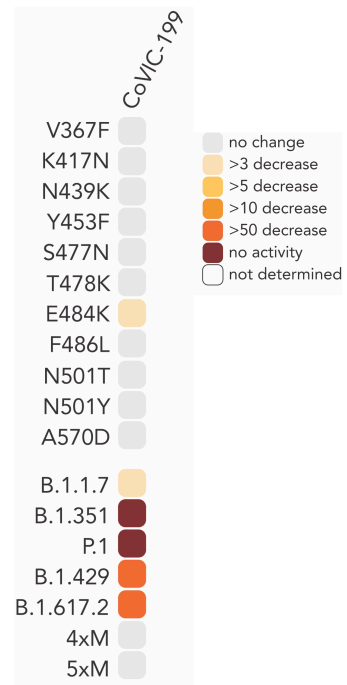**Fig. S14**

1043

1044

1045

1046 **Figure S14. NS-EM and neutralization of a bi-specific antibody.** (A) NS-EM of CoVIC-199  
1047 demonstrates that this bi-specific antibody simultaneously engages the RBD-1 and NTD-1  
1048 epitopes. The ACE2 binding site and the NTD-supersite are outlined with a dotted line on the RBD  
1049 and NTD, respectively. (B) Fold-change in potency of pseudovirus neutralization by CoVIC-199.  
1050 Fig. S1 lists mutations present in each variant.

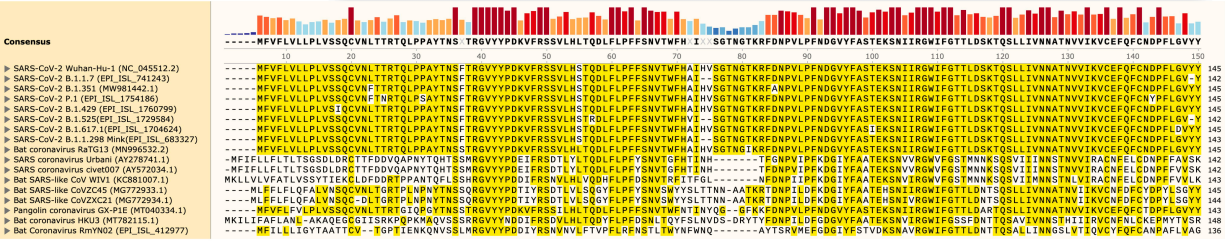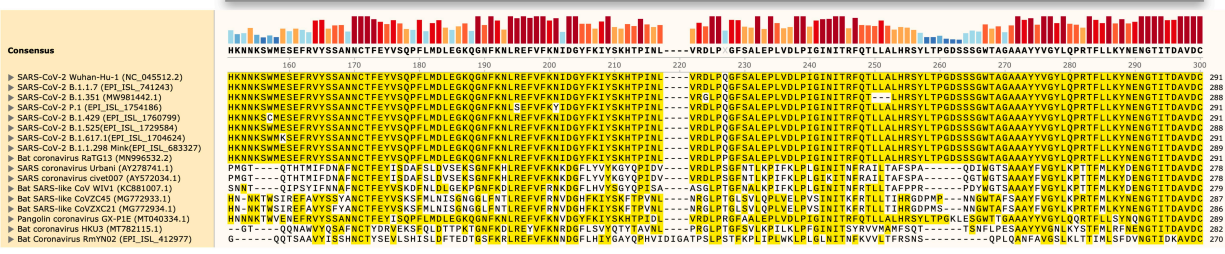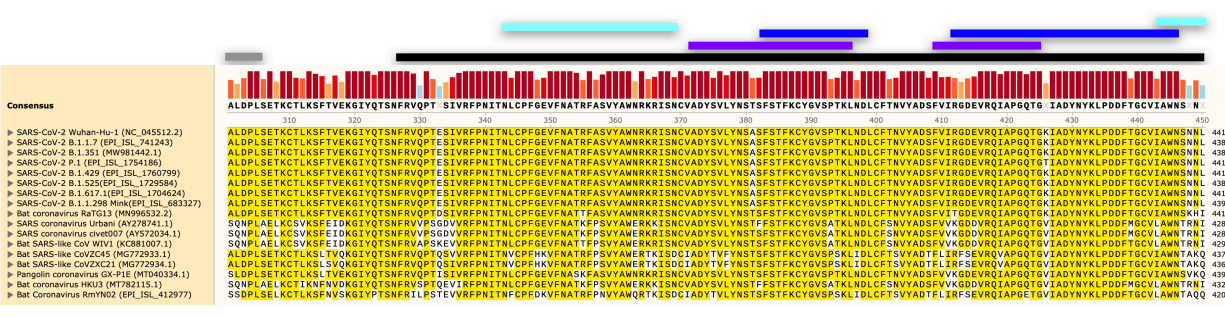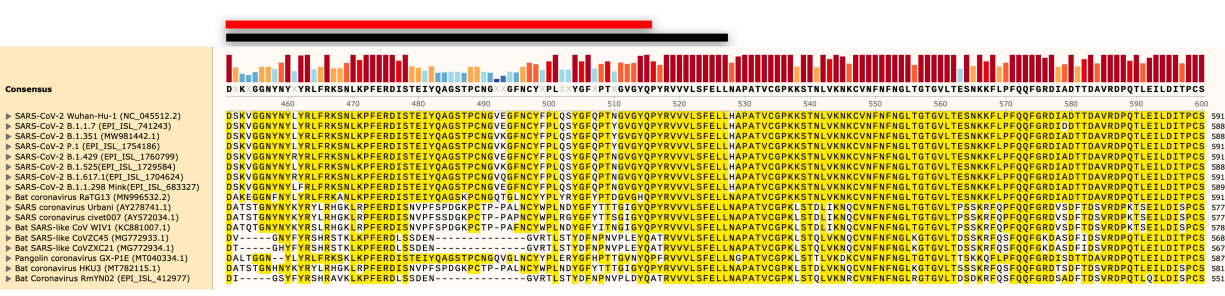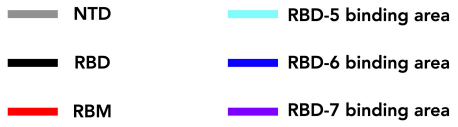

Fig. S15

1054 **Figure S15. Alignment of S1 subunit protein sequences of typical *Sarbecoviruses*.** VOCs of  
1055 SARS-CoV-2, SARS-CoV-2 like bat virus (RaTG13), SARS-CoV and other SARS-like  
1056 *Sarbecoviruses* were selected for the alignment using sequences obtained from GenBank or the  
1057 GISAID database. Sequence alignment was carried out using Snapgene with the Clustal Omega  
1058 method(56). Conserved residues are highlighted in yellow. NTDs and RBMs are the two most  
1059 variable regions among these *Sarbecoviruses*. Regions corresponding to the NTD, RBD and RBM  
1060 are indicated by gray, black and red bars, respectively. The approximate binding areas of RBD-5,  
1061 -6 and -7 antibodies are indicated by cyan, blue, and purple bars, respectively.

1062  
1063

1064 (Tables S1 to S4 are uploaded separately)

1065  
1066 **Table S1. Receptor blocking, antibody-RBD affinity and neutralization potencies for each**  
1067 **antibody.** IC50 values are the average of three to six independent experiments using different  
1068 virus preparations. The mean and standard deviation of triplicate measurements, when applicable,  
1069 are shown for the percent blocking of ACE-2 receptor RBD binding, association and dissociation  
1070 rate constants. “N.D”: value not determined; “N.B”: no binding or close to no binding was  
1071 observed; “W.B.”: extremely weak in response (< 30 RU) or in affinity (KD > 5.7 μM).

1072  
1073 **Table S2. Binary heatmap for the 186 RBD-directed antibodies.** Pairwise competition results  
1074 from a classical sandwich epitope binning with monomeric RBD using HT-SPR. The rows  
1075 indicate immobilized mAbs and the columns represent injected analyte mAbs. Light blue cells  
1076 indicate antibodies that formed a sandwiching pair and dark blue cells indicate blocking  
1077 interactions.

1078  
1079 **Table S3. Negative-stain EM analysis of representative CoVIC antibodies.** A total of 33  
1080 CoVIC antibodies representing different communities/clusters/bins were analyzed by NS-EM in  
1081 complex with Spike trimer. Antibody formats used for NS-EM study, EMDDB access numbers, 3D  
1082 views of NS-maps and representative 2D classes of dominant particle populations are listed. The  
1083 map for CoVIC-245 was obtained from a cryo-dataset. Models having different RBD status were  
1084 fitted into NS-maps: PDB:7A94(39) (one RBD up); PDB:7DCX(55) (two RBDs up);  
1085 PDB:7K4N(19) (three RBDs up).

1086  
1087

1088 **Table S4.** Fold-change in IC<sub>50</sub> of neutralizing mAbs against pseudoviruses with single mutations,  
1089 relative to G614-parent virus. Values above 3 (cyan shading) and below -3 (orange shading)  
1090 indicate an increase and decrease in potency, respectively. Dark red indicates a complete loss of  
1091 neutralization for that virus-antibody pair.

1092



1093 **References (40–56)**

- 1094 40. C.-L. Hsieh, J. A. Goldsmith, J. M. Schaub, A. M. DiVenere, H.-C. Kuo, K. Javanmardi, K.  
1095 C. Le, D. Wrapp, A. G. Lee, Y. Liu, C.-W. Chou, P. O. Byrne, C. K. Hjorth, N. V. Johnson,  
1096 J. Ludes-Meyers, A. W. Nguyen, J. Park, N. Wang, D. Amengor, J. J. Lavinder, G. C.  
1097 Ippolito, J. A. Maynard, I. J. Finkelstein, J. S. McLellan, Structure-based design of prefusion-  
1098 stabilized SARS-CoV-2 spikes. *Science*. **369**, 1501–1505 (2020).
- 1099 41. E. Seydoux, L. J. Homad, A. J. MacCamy, K. R. Parks, N. K. Hurlburt, M. F. Jennewein, N.  
1100 R. Akins, A. B. Stuart, Y.-H. Wan, J. Feng, R. E. Whaley, S. Singh, M. Boeckh, K. W. Cohen,  
1101 M. J. McElrath, J. A. Englund, H. Y. Chu, M. Pancera, A. T. McGuire, L. Stamatatos,  
1102 Analysis of a SARS-CoV-2-Infected Individual Reveals Development of Potent Neutralizing  
1103 Antibodies with Limited Somatic Mutation. *Immunity*. **53**, 98–105.e5 (2020).
- 1104 42. G. Chao, W. L. Lau, B. J. Hackel, S. L. Sazinsky, S. M. Lippow, K. D. Wittrup, Isolating and  
1105 engineering human antibodies using yeast surface display. *Nat. Protoc.* **1**, 755–768 (2006).
- 1106 43. A. Miller, S. Carr, T. Rabbitts, H. Ali, Multimeric antibodies with increased valency  
1107 surpassing functional affinity and potency thresholds using novel formats. *MAbs*. **12**,  
1108 1752529 (2020).
- 1109 44. M. D. Beasley, K. P. Niven, W. R. Winnall, B. R. Kiefel, Bacterial cytoplasmic display  
1110 platform Retained Display (ReD) identifies stable human germline antibody frameworks.  
1111 *Biotechnol. J.* **10**, 783–789 (2015).
- 1112 45. H. Yao, Y. Sun, Y.-Q. Deng, N. Wang, Y. Tan, N.-N. Zhang, X.-F. Li, C. Kong, Y.-P. Xu,  
1113 Q. Chen, T.-S. Cao, H. Zhao, X. Yan, L. Cao, Z. Lv, D. Zhu, R. Feng, N. Wu, W. Zhang, Y.  
1114 Hu, K. Chen, R.-R. Zhang, Q. Lv, S. Sun, Y. Zhou, R. Yan, G. Yang, X. Sun, C. Liu, X. Lu,  
1115 L. Cheng, H. Qiu, X.-Y. Huang, T. Weng, D. Shi, W. Jiang, J. Shao, L. Wang, J. Zhang, T.  
1116 Jiang, G. Lang, C.-F. Qin, L. Li, X. Wang, Rational development of a human antibody  
1117 cocktail that deploys multiple functions to confer Pan-SARS-CoVs protection. *Cell Res.* **31**,  
1118 25–36 (2021).
- 1119 46. S. J. Zost, P. Gilchuk, J. B. Case, E. Binshtein, R. E. Chen, J. P. Nkolola, A. Schäfer, J. X.  
1120 Reidy, A. Trivette, R. S. Nargi, R. E. Sutton, N. Suryadevara, D. R. Martinez, L. E.

- 1121 Williamson, E. C. Chen, T. Jones, S. Day, L. Myers, A. O. Hassan, N. M. Kafai, E. S.  
1122 Winkler, J. M. Fox, S. Shrihari, B. K. Mueller, J. Meiler, A. Chandrashekar, N. B. Mercado,  
1123 J. J. Steinhardt, K. Ren, Y.-M. Loo, N. L. Kallewaard, B. T. McCune, S. P. Keeler, M. J.  
1124 Holtzman, D. H. Barouch, L. E. Gralinski, R. S. Baric, L. B. Thackray, M. S. Diamond, R.  
1125 H. Carnahan, J. E. Crowe Jr, Potently neutralizing and protective human antibodies against  
1126 SARS-CoV-2. *Nature*. **584**, 443–449 (2020).
- 1127 47. S. J. Zost, P. Gilchuk, R. E. Chen, J. B. Case, J. X. Reidy, A. Trivette, R. S. Nargi, R. E.  
1128 Sutton, N. Suryadevara, E. C. Chen, E. Binshtein, S. Shrihari, M. Ostrowski, H. Y. Chu, J. E.  
1129 Didier, K. W. MacRenaris, T. Jones, S. Day, L. Myers, F. Eun-Hyung Lee, D. C. Nguyen, I.  
1130 Sanz, D. R. Martinez, P. W. Rothlauf, L.-M. Bloyet, S. P. J. Whelan, R. S. Baric, L. B.  
1131 Thackray, M. S. Diamond, R. H. Carnahan, J. E. Crowe Jr, Rapid isolation and profiling of a  
1132 diverse panel of human monoclonal antibodies targeting the SARS-CoV-2 spike protein. *Nat.*  
1133 *Med.* (2020), doi:10.1038/s41591-020-0998-x.
- 1134 48. M. T. Tomic, Y. Espinoza, Z. Martinez, K. Pham, R. R. Cobb, D. M. Snow, C. G. Earnhart,  
1135 T. Pals, E. S. Syar, N. Niemuth, D. J. Kobs, S. Farr-Jones, J. D. Marks, Monoclonal Antibody  
1136 Combinations Prevent Serotype A and Serotype B Inhalational Botulism in a Guinea Pig  
1137 Model. *Toxins* . **11** (2019), doi:10.3390/toxins11040208.
- 1138 49. L. Liu, P. Wang, M. S. Nair, J. Yu, M. Rapp, Q. Wang, Y. Luo, J. F.-W. Chan, V. Sahi, A.  
1139 Figueroa, X. V. Guo, G. Cerutti, J. Bimela, J. Gorman, T. Zhou, Z. Chen, K.-Y. Yuen, P. D.  
1140 Kwong, J. G. Sodroski, M. T. Yin, Z. Sheng, Y. Huang, L. Shapiro, D. D. Ho, Potent  
1141 neutralizing antibodies directed to multiple epitopes on SARS-CoV-2 spike. *Nature* (2020),  
1142 doi:10.1038/s41586-020-2571-7.
- 1143 50. J. Wan, S. Xing, L. Ding, Y. Wang, C. Gu, Y. Wu, B. Rong, C. Li, S. Wang, K. Chen, C. He,  
1144 D. Zhu, S. Yuan, C. Qiu, C. Zhao, L. Nie, Z. Gao, J. Jiao, X. Zhang, X. Wang, T. Ying, H.  
1145 Wang, Y. Xie, Y. Lu, J. Xu, F. Lan, Human-IgG-Neutralizing Monoclonal Antibodies Block  
1146 the SARS-CoV-2 Infection. *Cell Rep.* **32**, 107918 (2020).
- 1147 51. W. Schaefer, J. T. Regula, M. Böhner, J. Schanzer, R. Croasdale, H. Dürr, C. Gassner, G.  
1148 Georges, H. Kettenberger, S. Imhof-Jung, M. Schwaiger, K. G. Stubenrauch, C. Sustmann,  
1149 M. Thomas, W. Scheuer, C. Klein, Immunoglobulin domain crossover as a generic approach

- 1150 for the production of bispecific IgG antibodies. *Proc. Natl. Acad. Sci. U. S. A.* **108**, 11187–  
1151 11192 (2011).
- 1152 52. K. Li, G. Q. Horn, S. M. Alam, G. D. Tomaras, S. M. Dennison, Titrationanalysis: A Tool  
1153 for High-throughput Analysis of Binding Kinetics Data for Multiple Label-Free Platforms.  
1154 *Biophys. J.* **120**, 265a–266a (2021).
- 1155 53. A. Punjani, J. L. Rubinstein, D. J. Fleet, M. A. Brubaker, cryoSPARC: algorithms for rapid  
1156 unsupervised cryo-EM structure determination. *Nat. Methods.* **14**, 290–296 (2017).
- 1157 54. E. F. Pettersen, T. D. Goddard, C. C. Huang, E. C. Meng, G. S. Couch, T. I. Croll, J. H.  
1158 Morris, T. E. Ferrin, UCSF ChimeraX: Structure visualization for researchers, educators, and  
1159 developers. *Protein Sci.* **30**, 70–82 (2021).
- 1160 55. C. Zhang, Y. Wang, Y. Zhu, C. Liu, C. Gu, S. Xu, Y. Wang, Y. Zhou, Y. Wang, W. Han, X.  
1161 Hong, Y. Yang, X. Zhang, T. Wang, C. Xu, Q. Hong, S. Wang, Q. Zhao, W. Qiao, J. Zang,  
1162 L. Kong, F. Wang, H. Wang, D. Qu, D. Lavillette, H. Tang, Q. Deng, Y. Xie, Y. Cong, Z.  
1163 Huang, Development and structural basis of a two-MAb cocktail for treating SARS-CoV-2  
1164 infections. *Nat. Commun.* **12**, 264 (2021).
- 1165 56. F. Sievers, A. Wilm, D. Dineen, T. J. Gibson, K. Karplus, W. Li, R. Lopez, H. McWilliam,  
1166 M. Remmert, J. Söding, J. D. Thompson, D. G. Higgins, Fast, scalable generation of high-  
1167 quality protein multiple sequence alignments using Clustal Omega. *Mol. Syst. Biol.* **7**, 539  
1168 (2011).
- 1169  
1170  
1171
